# Supplementary material for: Immune Responses to Gram-Negative Bacteria in Hemolymph of the Chinese Horseshoe Crab, Tachypleus tridentatus
Source: Front Immunol. 2021 Jan 29;11:584808. doi: 10.3389/fimmu.2020.584808 (PMC7878551; doi:10.3389/fimmu.2020.584808)
Supplement: Supplementary file 3 [file DataSheet_2.xlsx]

## Sheet: Up-regulated_GO_Terms_12h
Number	GO ID	Term Type	Description	Ratio_in_study	Ratio_in_pop	Pvalue_uncorrected	Pvalue_corrected
75	GO:0007165	BP	signal transduction	75/513	1088/19723	1.82467e-06	0.000926847
6	GO:0006525	BP	arginine metabolic process	6/513	16/19723	1.92919e-06	0.000926847
130	GO:0065007	BP	biological regulation	130/513	3225/19723	2.80311e-06	0.000926847
10	GO:0045087	BP	innate immune response	10/513	60/19723	3.04692e-06	0.000926847
22	GO:0007166	BP	cell surface receptor signaling pathway	22/513	276/19723	3.60391e-06	0.000926847
27	GO:0048583	BP	regulation of response to stimulus	27/513	388/19723	3.90284e-06	0.000926847
38	GO:0005886	CC	plasma membrane	38/513	486/19723	5.7157e-07	0.000926847
24	GO:0044421	CC	extracellular region part	24/513	210/19723	6.4505e-07	0.000926847
24	GO:0005615	CC	extracellular space	24/513	195/19723	8.67239e-07	0.000926847
24	GO:0009966	BP	regulation of signal transduction	24/513	324/19723	4.68495e-06	0.000940789
116	GO:0050789	BP	regulation of biological process	116/513	2900/19723	4.73895e-06	0.000940789
112	GO:0050794	BP	regulation of cellular process	112/513	2809/19723	4.80679e-06	0.000940789
199	GO:0031224	CC	intrinsic component of membrane	199/513	5583/19723	4.52667e-06	0.000940789
206	GO:0044425	CC	membrane part	206/513	5930/19723	5.35724e-06	0.00100192
196	GO:0016021	CC	integral component of membrane	196/513	5567/19723	5.64091e-06	0.00101008
4	GO:0006526	BP	arginine biosynthetic process	4/513	6/19723	6.51018e-06	0.00109579
4	GO:0004055	MF	argininosuccinate synthase activity	4/513	6/19723	6.51018e-06	0.00109579
97	GO:0097367	MF	carbohydrate derivative binding	97/513	2399/19723	1.03685e-05	0.00161596
25	GO:0010646	BP	regulation of cell communication	25/513	370/19723	1.46919e-05	0.00220798
25	GO:0023051	BP	regulation of signaling	25/513	371/19723	1.53786e-05	0.00223149
11	GO:0002376	BP	immune system process	11/513	89/19723	1.93866e-05	0.00254934
353	GO:0005575	CC	cellular_component	353/513	11788/19723	2.10347e-05	0.00268224
102	GO:0043168	MF	anion binding	102/513	2601/19723	2.07984e-05	0.00268224
17	GO:1902531	BP	regulation of intracellular signal transduction	17/513	207/19723	3.11794e-05	0.00391651
16	GO:0031226	CC	intrinsic component of plasma membrane	16/513	187/19723	3.22317e-05	0.00398914
10	GO:0006955	BP	immune response	10/513	79/19723	3.74485e-05	0.00450238
47	GO:0005215	MF	transporter activity	47/513	961/19723	3.91392e-05	0.00462328
43	GO:0022857	MF	transmembrane transporter activity	43/513	858/19723	3.95528e-05	0.00462328
102	GO:0036094	MF	small molecule binding	102/513	2643/19723	4.26581e-05	0.00491796
4	GO:0002224	BP	toll-like receptor signaling pathway	4/513	9/19723	5.13754e-05	0.00576501
3	GO:0008063	BP	Toll signaling pathway	3/513	4/19723	6.86292e-05	0.00750108
3	GO:0047066	MF	phospholipid-hydroperoxide glutathione peroxidase activity	3/513	4/19723	6.86292e-05	0.00750108
5	GO:0045088	BP	regulation of innate immune response	5/513	18/19723	7.5551e-05	0.00815176
13	GO:0005085	MF	guanyl-nucleotide exchange factor activity	13/513	142/19723	8.79582e-05	0.00929808
5	GO:0032958	BP	inositol phosphate biosynthetic process	5/513	19/19723	0.000100349	0.0101752
4	GO:0002221	BP	pattern recognition receptor signaling pathway	4/513	11/19723	0.00012908	0.0127805
4	GO:0002758	BP	innate immune response-activating signal transduction	4/513	11/19723	0.00012908	0.0127805
11	GO:0046578	BP	regulation of Ras protein signal transduction	11/513	110/19723	0.00013872	0.0135752
6	GO:0050776	BP	regulation of immune response	6/513	32/19723	0.000153258	0.0148255
5	GO:0050778	BP	positive regulation of immune response	5/513	21/19723	0.000168216	0.0157332
5	GO:0031347	BP	regulation of defense response	5/513	21/19723	0.000168216	0.0157332
3	GO:0000053	BP	argininosuccinate metabolic process	3/513	5/19723	0.000168249	0.0157332
9	GO:0005089	MF	Rho guanyl-nucleotide exchange factor activity	9/513	77/19723	0.000170473	0.0157659
87	GO:0032553	MF	ribonucleotide binding	87/513	2262/19723	0.000184557	0.0165238
4	GO:0002218	BP	activation of innate immune response	4/513	12/19723	0.000189646	0.0166256
8	GO:1901617	BP	organic hydroxy compound biosynthetic process	8/513	62/19723	0.00019531	0.0167727
14	GO:0005887	CC	integral component of plasma membrane	14/513	175/19723	0.00020194	0.017167
9	GO:0035023	BP	regulation of Rho protein signal transduction	9/513	79/19723	0.000207742	0.0173105
27	GO:0098772	MF	molecular function regulator	27/513	488/19723	0.000239505	0.0197615
7	GO:0046165	BP	alcohol biosynthetic process	7/513	49/19723	0.000257787	0.0208609
5	GO:0002684	BP	positive regulation of immune system process	5/513	23/19723	0.000266463	0.0209087
4	GO:0002764	BP	immune response-regulating signaling pathway	4/513	13/19723	0.000268315	0.0209087
4	GO:0045089	BP	positive regulation of innate immune response	4/513	13/19723	0.000268315	0.0209087
4	GO:0002757	BP	immune response-activating signal transduction	4/513	13/19723	0.000268315	0.0209087
11	GO:0051056	BP	regulation of small GTPase mediated signal transduction	11/513	120/19723	0.000299333	0.0229726
10	GO:0006952	BP	defense response	10/513	101/19723	0.000300259	0.0229726
26	GO:0035556	BP	intracellular signal transduction	26/513	470/19723	0.000321435	0.0243711
3	GO:0000050	BP	urea cycle	3/513	6/19723	0.000329988	0.0245416
22	GO:0044459	CC	plasma membrane part	22/513	368/19723	0.000332431	0.0245416
9	GO:0005088	MF	Ras guanyl-nucleotide exchange factor activity	9/513	84/19723	0.0003314	0.0245416
13	GO:0008236	MF	serine-type peptidase activity	13/513	163/19723	0.000347838	0.0252362
13	GO:0017171	MF	serine hydrolase activity	13/513	163/19723	0.000347838	0.0252362
21	GO:0004888	MF	transmembrane signaling receptor activity	21/513	339/19723	0.000356657	0.0256549
4	GO:0031349	BP	positive regulation of defense response	4/513	14/19723	0.000367943	0.0260928
94	GO:1901265	MF	nucleoside phosphate binding	94/513	2533/19723	0.000372046	0.0260928
94	GO:0000166	MF	nucleotide binding	94/513	2533/19723	0.000372046	0.0260928
21	GO:0099600	MF	transmembrane receptor activity	21/513	343/19723	0.000384498	0.0267433
5	GO:0046173	BP	polyol biosynthetic process	5/513	25/19723	0.000403058	0.0278044
8	GO:0015103	MF	inorganic anion transmembrane transporter activity	8/513	69/19723	0.000412155	0.0281758
84	GO:0032555	MF	purine ribonucleotide binding	84/513	2232/19723	0.000510257	0.0340819
84	GO:0017076	MF	purine nucleotide binding	84/513	2236/19723	0.000518602	0.0343666
6	GO:0002682	BP	regulation of immune system process	6/513	40/19723	0.000544466	0.0357986
18	GO:0005576	CC	extracellular region	18/513	287/19723	0.000555461	0.0359597
8	GO:0032440	MF	2-alkenal reductase [NAD(P)] activity	8/513	72/19723	0.000551269	0.0359597
3	GO:0019627	BP	urea metabolic process	3/513	7/19723	0.000566322	0.0363829
83	GO:0032549	MF	ribonucleoside binding	83/513	2206/19723	0.000620337	0.0392538
83	GO:0001882	MF	nucleoside binding	83/513	2210/19723	0.000626733	0.0393626
2	GO:0035325	MF	Toll-like receptor binding	2/513	2/19723	0.000675248	0.0416183
9	GO:0030154	BP	cell differentiation	9/513	93/19723	0.000704911	0.0429893
23	GO:0038023	MF	signaling receptor activity	23/513	412/19723	0.000741785	0.0449127
82	GO:0035639	MF	purine ribonucleoside triphosphate binding	82/513	2194/19723	0.000783293	0.0470871
82	GO:0001883	MF	purine nucleoside binding	82/513	2201/19723	0.00080322	0.0476049
82	GO:0032550	MF	purine ribonucleoside binding	82/513	2201/19723	0.00080322	0.0476049
11	GO:0004252	MF	serine-type endopeptidase activity	11/513	135/19723	0.000815123	0.0479726
4	GO:0002253	BP	activation of immune response	4/513	17/19723	0.000822235	0.0480551
55	GO:0016020	CC	membrane	55/513	1340/19723	0.00092358	0.0536058
5	GO:0043647	BP	inositol phosphate metabolic process	5/513	30/19723	0.000971354	0.0552359
5	GO:0009986	CC	cell surface	5/513	30/19723	0.000971354	0.0552359
5	GO:0015108	MF	chloride transmembrane transporter activity	5/513	30/19723	0.000971354	0.0552359
7	GO:0015293	MF	symporter activity	7/513	65/19723	0.00146221	0.0805583
9	GO:0004620	MF	phospholipase activity	9/513	103/19723	0.00146452	0.0805583
24	GO:0004871	MF	signal transducer activity	24/513	468/19723	0.00168004	0.0912205
3	GO:0071941	BP	nitrogen cycle metabolic process	3/513	10/19723	0.00183157	0.0981814
68	GO:0032559	MF	adenyl ribonucleotide binding	68/513	1807/19723	0.00186199	0.0991803
68	GO:0030554	MF	adenyl nucleotide binding	68/513	1809/19723	0.00188149	0.0995888
5	GO:0007178	BP	transmembrane receptor protein serine/threonine kinase signaling pathway	5/513	35/19723	0.00198888	0.104063
2	GO:0003956	MF	NAD(P)+-protein-arginine ADP-ribosyltransferase activity	2/513	3/19723	0.00199075	0.104063
9	GO:0048584	BP	positive regulation of response to stimulus	9/513	108/19723	0.0020372	0.104949
23	GO:0004872	MF	receptor activity	23/513	443/19723	0.0020451	0.104949
23	GO:0060089	MF	molecular transducer activity	23/513	443/19723	0.0020451	0.104949
4	GO:0005254	MF	chloride channel activity	4/513	22/19723	0.00227991	0.116289
6	GO:0051604	BP	protein maturation	6/513	53/19723	0.00245076	0.12425
5	GO:0009084	BP	glutamine family amino acid biosynthetic process	5/513	37/19723	0.00255926	0.127448
8	GO:0016628	MF	oxidoreductase activity, acting on the CH-CH group of donors, NAD or NADP as acceptor	8/513	91/19723	0.00255093	0.127448
16	GO:0022804	MF	active transmembrane transporter activity	16/513	268/19723	0.00265374	0.131376
10	GO:0004930	MF	G-protein coupled receptor activity	10/513	134/19723	0.00266997	0.131406
66	GO:0005524	MF	ATP binding	66/513	1771/19723	0.00285527	0.139709
7	GO:0009064	BP	glutamine family amino acid metabolic process	7/513	74/19723	0.00309556	0.150268
9	GO:0016298	MF	lipase activity	9/513	115/19723	0.00312464	0.150268
9	GO:0000981	MF	RNA polymerase II transcription factor activity, sequence-specific DNA binding	9/513	115/19723	0.00312464	0.150268
13	GO:0007155	BP	cell adhesion	13/513	210/19723	0.00349882	0.164895
13	GO:0022610	BP	biological adhesion	13/513	210/19723	0.00349882	0.164895
9	GO:1901615	BP	organic hydroxy compound metabolic process	9/513	117/19723	0.00350714	0.164895
295	GO:0008150	BP	biological_process	295/513	10075/19723	0.00359215	0.167953
2	GO:0030509	BP	BMP signaling pathway	2/513	4/19723	0.00391287	0.1761
2	GO:0045338	BP	farnesyl diphosphate metabolic process	2/513	4/19723	0.00391287	0.1761
2	GO:0048250	BP	mitochondrial iron ion transport	2/513	4/19723	0.00391287	0.1761
2	GO:0002755	BP	MyD88-dependent toll-like receptor signaling pathway	2/513	4/19723	0.00391287	0.1761
2	GO:0045337	BP	farnesyl diphosphate biosynthetic process	2/513	4/19723	0.00391287	0.1761
2	GO:0070976	MF	TIR domain binding	2/513	4/19723	0.00391287	0.1761
2	GO:0004630	MF	phospholipase D activity	2/513	4/19723	0.00391287	0.1761
3	GO:0004012	MF	phospholipid-translocating ATPase activity	3/513	13/19723	0.00411866	0.184376
6	GO:0080134	BP	regulation of response to stress	6/513	59/19723	0.00422142	0.186987
10	GO:0043492	MF	ATPase activity, coupled to movement of substances	10/513	143/19723	0.00425729	0.187588
5	GO:0016485	BP	protein processing	5/513	42/19723	0.00449146	0.196876
9	GO:0008081	MF	phosphoric diester hydrolase activity	9/513	124/19723	0.00514286	0.219707
7	GO:0007167	BP	enzyme linked receptor protein signaling pathway	7/513	83/19723	0.00585401	0.245111
5	GO:0019751	BP	polyol metabolic process	5/513	45/19723	0.00605383	0.252223
17	GO:0006520	BP	cellular amino acid metabolic process	17/513	319/19723	0.00636364	0.253431
2	GO:0010862	BP	positive regulation of pathway-restricted SMAD protein phosphorylation	2/513	5/19723	0.00640929	0.253431
2	GO:0043123	BP	positive regulation of I-kappaB kinase/NF-kappaB signaling	2/513	5/19723	0.00640929	0.253431
2	GO:0060395	BP	SMAD protein signal transduction	2/513	5/19723	0.00640929	0.253431
2	GO:0060393	BP	regulation of pathway-restricted SMAD protein phosphorylation	2/513	5/19723	0.00640929	0.253431
4	GO:0050817	BP	coagulation	4/513	29/19723	0.00641406	0.253431
4	GO:0042381	BP	hemolymph coagulation	4/513	29/19723	0.00641406	0.253431
4	GO:0007599	BP	hemostasis	4/513	29/19723	0.00641406	0.253431
2	GO:0015321	MF	sodium-dependent phosphate transmembrane transporter activity	2/513	5/19723	0.00640929	0.253431
2	GO:0005160	MF	transforming growth factor beta receptor binding	2/513	5/19723	0.00640929	0.253431
7	GO:0008061	MF	chitin binding	7/513	85/19723	0.00665923	0.261888
9	GO:0015291	MF	secondary active transmembrane transporter activity	9/513	130/19723	0.0069688	0.272788
4	GO:0050878	BP	regulation of body fluid levels	4/513	30/19723	0.0072514	0.281234
4	GO:0005253	MF	anion channel activity	4/513	30/19723	0.0072514	0.281234
3	GO:0004602	MF	glutathione peroxidase activity	3/513	16/19723	0.00761078	0.29279
14	GO:0044707	BP	single-multicellular organism process	14/513	252/19723	0.00772181	0.295394
9	GO:0008509	MF	anion transmembrane transporter activity	9/513	134/19723	0.00843737	0.321307
2	GO:0051339	BP	regulation of lyase activity	2/513	6/19723	0.00944894	0.341297
2	GO:0031279	BP	regulation of cyclase activity	2/513	6/19723	0.00944894	0.341297
2	GO:0043122	BP	regulation of I-kappaB kinase/NF-kappaB signaling	2/513	6/19723	0.00944894	0.341297
2	GO:0030804	BP	positive regulation of cyclic nucleotide biosynthetic process	2/513	6/19723	0.00944894	0.341297
2	GO:0030801	BP	positive regulation of cyclic nucleotide metabolic process	2/513	6/19723	0.00944894	0.341297
2	GO:0030802	BP	regulation of cyclic nucleotide biosynthetic process	2/513	6/19723	0.00944894	0.341297
2	GO:0051349	BP	positive regulation of lyase activity	2/513	6/19723	0.00944894	0.341297
2	GO:0031281	BP	positive regulation of cyclase activity	2/513	6/19723	0.00944894	0.341297
2	GO:0016114	BP	terpenoid biosynthetic process	2/513	6/19723	0.00944894	0.341297
2	GO:0030799	BP	regulation of cyclic nucleotide metabolic process	2/513	6/19723	0.00944894	0.341297
2	GO:0008101	BP	decapentaplegic signaling pathway	2/513	6/19723	0.00944894	0.341297
19	GO:0042578	MF	phosphoric ester hydrolase activity	19/513	392/19723	0.00928927	0.341297
7	GO:0006030	BP	chitin metabolic process	7/513	91/19723	0.00956988	0.344189
16	GO:0006357	BP	regulation of transcription from RNA polymerase II promoter	16/513	309/19723	0.00983192	0.352108
8	GO:0006575	BP	cellular modified amino acid metabolic process	8/513	115/19723	0.0103819	0.368667
6	GO:0019199	MF	transmembrane receptor protein kinase activity	6/513	71/19723	0.0103492	0.368667
6	GO:0043235	CC	receptor complex	6/513	72/19723	0.0110492	0.385852
4	GO:0006959	BP	humoral immune response	4/513	34/19723	0.0113119	0.391774
15	GO:0032501	BP	multicellular organismal process	15/513	283/19723	0.0122285	0.420864
3	GO:0090092	BP	regulation of transmembrane receptor protein serine/threonine kinase signaling pathway	3/513	19/19723	0.0124314	0.420864
2	GO:0030810	BP	positive regulation of nucleotide biosynthetic process	2/513	7/19723	0.013002	0.420864
2	GO:0006721	BP	terpenoid metabolic process	2/513	7/19723	0.013002	0.420864
2	GO:0046209	BP	nitric oxide metabolic process	2/513	7/19723	0.013002	0.420864
2	GO:0006809	BP	nitric oxide biosynthetic process	2/513	7/19723	0.013002	0.420864
2	GO:1900373	BP	positive regulation of purine nucleotide biosynthetic process	2/513	7/19723	0.013002	0.420864
2	GO:1900371	BP	regulation of purine nucleotide biosynthetic process	2/513	7/19723	0.013002	0.420864
2	GO:0030808	BP	regulation of nucleotide biosynthetic process	2/513	7/19723	0.013002	0.420864
2	GO:0045332	BP	phospholipid translocation	2/513	7/19723	0.013002	0.420864
2	GO:0006751	BP	glutathione catabolic process	2/513	7/19723	0.013002	0.420864
2	GO:0009952	BP	anterior/posterior pattern specification	2/513	7/19723	0.013002	0.420864
2	GO:0006954	BP	inflammatory response	2/513	7/19723	0.013002	0.420864
28	GO:0070011	MF	peptidase activity, acting on L-amino acid peptides	28/513	664/19723	0.0124169	0.420864
3	GO:0016755	MF	transferase activity, transferring amino-acyl groups	3/513	19/19723	0.0124314	0.420864
2	GO:0005381	MF	iron ion transmembrane transporter activity	2/513	7/19723	0.013002	0.420864
2	GO:0004517	MF	nitric-oxide synthase activity	2/513	7/19723	0.013002	0.420864
7	GO:1901071	BP	glucosamine-containing compound metabolic process	7/513	97/19723	0.0133159	0.429374
26	GO:0015075	MF	ion transmembrane transporter activity	26/513	611/19723	0.0135706	0.435918
9	GO:0051082	MF	unfolded protein binding	9/513	145/19723	0.0136902	0.438086
5	GO:0007229	BP	integrin-mediated signaling pathway	5/513	55/19723	0.0139627	0.443433
5	GO:0015294	MF	solute:cation symporter activity	5/513	55/19723	0.0139627	0.443433
7	GO:0006066	BP	alcohol metabolic process	7/513	98/19723	0.0140296	0.443885
3	GO:0042219	BP	cellular modified amino acid catabolic process	3/513	20/19723	0.0143475	0.447217
3	GO:0098636	CC	protein complex involved in cell adhesion	3/513	20/19723	0.0143475	0.447217
3	GO:0008305	CC	integrin complex	3/513	20/19723	0.0143475	0.447217
3	GO:0046915	MF	transition metal ion transmembrane transporter activity	3/513	20/19723	0.0143475	0.447217
8	GO:0016627	MF	oxidoreductase activity, acting on the CH-CH group of donors	8/513	122/19723	0.0144668	0.449271
7	GO:0006040	BP	amino sugar metabolic process	7/513	99/19723	0.0147703	0.454803
13	GO:0046873	MF	metal ion transmembrane transporter activity	13/513	248/19723	0.0147676	0.454803
31	GO:0022892	MF	substrate-specific transporter activity	31/513	768/19723	0.0148071	0.454803
4	GO:0015370	MF	solute:sodium symporter activity	4/513	37/19723	0.0151587	0.463912
37	GO:0044765	BP	single-organism transport	37/513	958/19723	0.0162469	0.49185
49	GO:0051179	BP	localization	49/513	1346/19723	0.0163951	0.493581
3	GO:0046777	BP	protein autophosphorylation	3/513	21/19723	0.0164214	0.493581
4	GO:0000041	BP	transition metal ion transport	4/513	38/19723	0.0166027	0.497253
6	GO:0009967	BP	positive regulation of signal transduction	6/513	79/19723	0.0169102	0.499675
2	GO:1901264	BP	carbohydrate derivative transport	2/513	8/19723	0.0170398	0.499675
2	GO:0034204	BP	lipid translocation	2/513	8/19723	0.0170398	0.499675
2	GO:0015114	MF	phosphate ion transmembrane transporter activity	2/513	8/19723	0.0170398	0.499675
2	GO:0005126	MF	cytokine receptor binding	2/513	8/19723	0.0170398	0.499675
4	GO:0019932	BP	second-messenger-mediated signaling	4/513	39/19723	0.0181299	0.529795
3	GO:0015748	BP	organophosphate ester transport	3/513	22/19723	0.0186543	0.543233
45	GO:0006810	BP	transport	45/513	1217/19723	0.0195267	0.565111
39	GO:1902578	BP	single-organism localization	39/513	1024/19723	0.0196825	0.565111
5	GO:0003713	MF	transcription coactivator activity	5/513	60/19723	0.0197409	0.565111
5	GO:0004714	MF	transmembrane receptor protein tyrosine kinase activity	5/513	60/19723	0.0197409	0.565111
4	GO:0005516	MF	calmodulin binding	4/513	40/19723	0.0197416	0.565111
7	GO:0030414	MF	peptidase inhibitor activity	7/513	105/19723	0.0198084	0.565111
3	GO:0031225	CC	anchored component of membrane	3/513	23/19723	0.0210469	0.586997
3	GO:0008083	MF	growth factor activity	3/513	23/19723	0.0210469	0.586997
2	GO:0090100	BP	positive regulation of transmembrane receptor protein serine/threonine kinase signaling pathway	2/513	9/19723	0.0215348	0.592267
7	GO:0006022	BP	aminoglycan metabolic process	7/513	107/19723	0.0217256	0.592267
6	GO:0045595	BP	regulation of cell differentiation	6/513	85/19723	0.023398	0.592267
3	GO:0008299	BP	isoprenoid biosynthetic process	3/513	24/19723	0.0235995	0.592267
1	GO:0006106	BP	fumarate metabolic process	1/513	1/19723	0.0260102	0.592267
1	GO:0051180	BP	vitamin transport	1/513	1/19723	0.0260102	0.592267
1	GO:0008217	BP	regulation of blood pressure	1/513	1/19723	0.0260102	0.592267
1	GO:0014066	BP	regulation of phosphatidylinositol 3-kinase signaling	1/513	1/19723	0.0260102	0.592267
1	GO:0019243	BP	methylglyoxal catabolic process to D-lactate via S-lactoyl-glutathione	1/513	1/19723	0.0260102	0.592267
1	GO:0070221	BP	sulfide oxidation, using sulfide:quinone oxidoreductase	1/513	1/19723	0.0260102	0.592267
1	GO:0006216	BP	cytidine catabolic process	1/513	1/19723	0.0260102	0.592267
1	GO:0009438	BP	methylglyoxal metabolic process	1/513	1/19723	0.0260102	0.592267
1	GO:0046189	BP	phenol-containing compound biosynthetic process	1/513	1/19723	0.0260102	0.592267
1	GO:1902767	BP	isoprenoid biosynthetic process via mevalonate	1/513	1/19723	0.0260102	0.592267
1	GO:1901160	BP	primary amino compound metabolic process	1/513	1/19723	0.0260102	0.592267
1	GO:1901162	BP	primary amino compound biosynthetic process	1/513	1/19723	0.0260102	0.592267
1	GO:0046087	BP	cytidine metabolic process	1/513	1/19723	0.0260102	0.592267
1	GO:0015889	BP	cobalamin transport	1/513	1/19723	0.0260102	0.592267
1	GO:0006654	BP	phosphatidic acid biosynthetic process	1/513	1/19723	0.0260102	0.592267
1	GO:0046473	BP	phosphatidic acid metabolic process	1/513	1/19723	0.0260102	0.592267
1	GO:0019418	BP	sulfide oxidation	1/513	1/19723	0.0260102	0.592267
1	GO:0034128	BP	negative regulation of MyD88-independent toll-like receptor signaling pathway	1/513	1/19723	0.0260102	0.592267
1	GO:0034127	BP	regulation of MyD88-independent toll-like receptor signaling pathway	1/513	1/19723	0.0260102	0.592267
1	GO:0034122	BP	negative regulation of toll-like receptor signaling pathway	1/513	1/19723	0.0260102	0.592267
1	GO:0034121	BP	regulation of toll-like receptor signaling pathway	1/513	1/19723	0.0260102	0.592267
1	GO:0015786	BP	UDP-glucose transport	1/513	1/19723	0.0260102	0.592267
1	GO:0048168	BP	regulation of neuronal synaptic plasticity	1/513	1/19723	0.0260102	0.592267
1	GO:0061727	BP	methylglyoxal catabolic process to lactate	1/513	1/19723	0.0260102	0.592267
1	GO:0031637	BP	regulation of neuronal synaptic plasticity in response to neurotrophin	1/513	1/19723	0.0260102	0.592267
1	GO:0016540	BP	protein autoprocessing	1/513	1/19723	0.0260102	0.592267
1	GO:0048678	BP	response to axon injury	1/513	1/19723	0.0260102	0.592267
1	GO:0046135	BP	pyrimidine nucleoside catabolic process	1/513	1/19723	0.0260102	0.592267
1	GO:0046133	BP	pyrimidine ribonucleoside catabolic process	1/513	1/19723	0.0260102	0.592267
1	GO:0009972	BP	cytidine deamination	1/513	1/19723	0.0260102	0.592267
1	GO:0045776	BP	negative regulation of blood pressure	1/513	1/19723	0.0260102	0.592267
1	GO:0051596	BP	methylglyoxal catabolic process	1/513	1/19723	0.0260102	0.592267
1	GO:0042427	BP	serotonin biosynthetic process	1/513	1/19723	0.0260102	0.592267
1	GO:0010142	BP	farnesyl diphosphate biosynthetic process, mevalonate pathway	1/513	1/19723	0.0260102	0.592267
1	GO:0042428	BP	serotonin metabolic process	1/513	1/19723	0.0260102	0.592267
45	GO:0051234	BP	establishment of localization	45/513	1242/19723	0.0264422	0.592267
2	GO:0006471	BP	protein ADP-ribosylation	2/513	10/19723	0.0264606	0.592267
2	GO:2001057	BP	reactive nitrogen species metabolic process	2/513	10/19723	0.0264606	0.592267
2	GO:0002237	BP	response to molecule of bacterial origin	2/513	10/19723	0.0264606	0.592267
2	GO:0032496	BP	response to lipopolysaccharide	2/513	10/19723	0.0264606	0.592267
2	GO:0018149	BP	peptide cross-linking	2/513	10/19723	0.0264606	0.592267
4	GO:0098791	CC	Golgi subcompartment	4/513	41/19723	0.0214389	0.592267
1	GO:1990745	CC	EARP complex	1/513	1/19723	0.0260102	0.592267
22	GO:0005829	CC	cytosol	22/513	526/19723	0.0260549	0.592267
14	GO:0016874	MF	ligase activity	14/513	284/19723	0.0217487	0.592267
27	GO:0022891	MF	substrate-specific transmembrane transporter activity	27/513	662/19723	0.0241095	0.592267
1	GO:0052862	MF	glucan endo-1,4-beta-glucanase activity, C-3 substituted reducing group	1/513	1/19723	0.0260102	0.592267
1	GO:0052861	MF	glucan endo-1,3-beta-glucanase activity, C-3 substituted reducing group	1/513	1/19723	0.0260102	0.592267
1	GO:0070700	MF	BMP receptor binding	1/513	1/19723	0.0260102	0.592267
1	GO:0003934	MF	GTP cyclohydrolase I activity	1/513	1/19723	0.0260102	0.592267
1	GO:0004333	MF	fumarate hydratase activity	1/513	1/19723	0.0260102	0.592267
1	GO:0070224	MF	sulfide:quinone oxidoreductase activity	1/513	1/19723	0.0260102	0.592267
1	GO:0032542	MF	sulfiredoxin activity	1/513	1/19723	0.0260102	0.592267
1	GO:0004800	MF	thyroxine 5'-deiodinase activity	1/513	1/19723	0.0260102	0.592267
1	GO:0047131	MF	saccharopine dehydrogenase (NAD+, L-glutamate-forming) activity	1/513	1/19723	0.0260102	0.592267
1	GO:0035299	MF	inositol pentakisphosphate 2-kinase activity	1/513	1/19723	0.0260102	0.592267
1	GO:0004753	MF	saccharopine dehydrogenase activity	1/513	1/19723	0.0260102	0.592267
1	GO:0052736	MF	beta-glucanase activity	1/513	1/19723	0.0260102	0.592267
1	GO:0070696	MF	transmembrane receptor protein serine/threonine kinase binding	1/513	1/19723	0.0260102	0.592267
1	GO:0042973	MF	glucan endo-1,3-beta-D-glucosidase activity	1/513	1/19723	0.0260102	0.592267
1	GO:0004510	MF	tryptophan 5-monooxygenase activity	1/513	1/19723	0.0260102	0.592267
1	GO:0033612	MF	receptor serine/threonine kinase binding	1/513	1/19723	0.0260102	0.592267
1	GO:0071566	MF	UFM1 activating enzyme activity	1/513	1/19723	0.0260102	0.592267
1	GO:0004326	MF	tetrahydrofolylpolyglutamate synthase activity	1/513	1/19723	0.0260102	0.592267
1	GO:0004609	MF	phosphatidylserine decarboxylase activity	1/513	1/19723	0.0260102	0.592267
2	GO:0003810	MF	protein-glutamine gamma-glutamyltransferase activity	2/513	10/19723	0.0264606	0.592267
5	GO:0016879	MF	ligase activity, forming carbon-nitrogen bonds	5/513	65/19723	0.0268979	0.600457
4	GO:0031984	CC	organelle subcompartment	4/513	44/19723	0.0270541	0.602347
7	GO:0061134	MF	peptidase regulator activity	7/513	113/19723	0.0282402	0.625447
7	GO:0000977	MF	RNA polymerase II regulatory region sequence-specific DNA binding	7/513	113/19723	0.0282402	0.625447
6	GO:0023056	BP	positive regulation of signaling	6/513	89/19723	0.0285439	0.630513
28	GO:0008233	MF	peptidase activity	28/513	704/19723	0.0287205	0.631101
6	GO:0010647	BP	positive regulation of cell communication	6/513	90/19723	0.0299377	0.656135
26	GO:0001071	MF	nucleic acid binding transcription factor activity	26/513	642/19723	0.030666	0.667124
26	GO:0003700	MF	transcription factor activity, sequence-specific DNA binding	26/513	642/19723	0.030666	0.667124
7	GO:0001012	MF	RNA polymerase II regulatory region DNA binding	7/513	115/19723	0.0306769	0.667124
2	GO:0050830	BP	defense response to Gram-positive bacterium	2/513	11/19723	0.0317918	0.682551
2	GO:0043171	BP	peptide catabolic process	2/513	11/19723	0.0317918	0.682551
2	GO:0009612	BP	response to mechanical stimulus	2/513	11/19723	0.0317918	0.682551
2	GO:0001227	MF	transcriptional repressor activity, RNA polymerase II transcription regulatory region sequence-specific binding	2/513	11/19723	0.0317918	0.682551
2	GO:0004185	MF	serine-type carboxypeptidase activity	2/513	11/19723	0.0317918	0.682551
13	GO:0044283	BP	small molecule biosynthetic process	13/513	271/19723	0.0319353	0.683887
3	GO:0006720	BP	isoprenoid metabolic process	3/513	27/19723	0.032215	0.686383
3	GO:0005802	CC	trans-Golgi network	3/513	27/19723	0.032215	0.686383
5	GO:0006839	BP	mitochondrial transport	5/513	69/19723	0.0336772	0.715348
10	GO:0004721	MF	phosphoprotein phosphatase activity	10/513	190/19723	0.0338176	0.715348
19	GO:0004175	MF	endopeptidase activity	19/513	446/19723	0.0338294	0.715348
6	GO:0031982	CC	vesicle	6/513	93/19723	0.0343842	0.725257
3	GO:0007389	BP	pattern specification process	3/513	28/19723	0.0354036	0.744891
6	GO:0030054	CC	cell junction	6/513	94/19723	0.035956	0.754628
2	GO:0046658	CC	anchored component of plasma membrane	2/513	12/19723	0.0375042	0.780782
2	GO:0070008	MF	serine-type exopeptidase activity	2/513	12/19723	0.0375042	0.780782
6	GO:0004866	MF	endopeptidase inhibitor activity	6/513	95/19723	0.0375733	0.780782
3	GO:0098802	CC	plasma membrane receptor complex	3/513	29/19723	0.0387485	0.801247
3	GO:0005548	MF	phospholipid transporter activity	3/513	29/19723	0.0387485	0.801247
6	GO:0007034	BP	vacuolar transport	6/513	96/19723	0.0392362	0.809344
4	GO:0009607	BP	response to biotic stimulus	4/513	50/19723	0.0406978	0.835396
4	GO:0043207	BP	response to external biotic stimulus	4/513	50/19723	0.0406978	0.835396
6	GO:0009605	BP	response to external stimulus	6/513	97/19723	0.0409453	0.836397
6	GO:0061135	MF	endopeptidase regulator activity	6/513	97/19723	0.0409453	0.836397
7	GO:0050793	BP	regulation of developmental process	7/513	123/19723	0.0418234	0.852265
3	GO:0005925	CC	focal adhesion	3/513	30/19723	0.0422482	0.856773
3	GO:0010181	MF	FMN binding	3/513	30/19723	0.0422482	0.856773
2	GO:0044273	BP	sulfur compound catabolic process	2/513	13/19723	0.0435742	0.869007
2	GO:1903409	BP	reactive oxygen species biosynthetic process	2/513	13/19723	0.0435742	0.869007
4	GO:0030133	CC	transport vesicle	4/513	51/19723	0.0432886	0.869007
5	GO:0016023	CC	cytoplasmic, membrane-bounded vesicle	5/513	74/19723	0.0435224	0.869007
5	GO:0031988	CC	membrane-bounded vesicle	5/513	74/19723	0.0435224	0.869007
2	GO:0004435	MF	phosphatidylinositol phospholipase C activity	2/513	13/19723	0.0435742	0.869007
2	GO:0004629	MF	phospholipase C activity	2/513	13/19723	0.0435742	0.869007
12	GO:0048869	BP	cellular developmental process	12/513	254/19723	0.0438489	0.872418
3	GO:0006458	BP	'de novo' protein folding	3/513	31/19723	0.0459007	0.87474
21	GO:0032502	BP	developmental process	21/513	516/19723	0.0475434	0.87474
2	GO:0007219	BP	Notch signaling pathway	2/513	14/19723	0.0499797	0.87474
4	GO:0070161	CC	anchoring junction	4/513	52/19723	0.0459701	0.87474
4	GO:0005912	CC	adherens junction	4/513	52/19723	0.0459701	0.87474
3	GO:0005924	CC	cell-substrate adherens junction	3/513	32/19723	0.0497041	0.87474
3	GO:0005328	MF	neurotransmitter:sodium symporter activity	3/513	31/19723	0.0459007	0.87474
3	GO:0005326	MF	neurotransmitter transporter activity	3/513	31/19723	0.0459007	0.87474
3	GO:0048029	MF	monosaccharide binding	3/513	31/19723	0.0459007	0.87474
2	GO:0046332	MF	SMAD binding	2/513	14/19723	0.0499797	0.87474

## Sheet: Up-regulated_GO_Terms_24h
Number	GO ID	Term Type	Description	Ratio_in_study	Ratio_in_pop	Pvalue_uncorrected	Pvalue_corrected
7	GO:0006525	BP	arginine metabolic process	7/610	16/19723	2.34708e-07	0.00122785
23	GO:0044421	CC	extracellular region part	23/610	210/19723	6.43631e-07	0.00122785
23	GO:0005615	CC	extracellular space	23/610	195/19723	7.32545e-07	0.00122785
38	GO:0005886	CC	plasma membrane	38/610	486/19723	1.53772e-06	0.00122785
444	GO:0005575	CC	cellular_component	444/610	11788/19723	4.57244e-06	0.00122785
16	GO:0000981	MF	RNA polymerase II transcription factor activity, sequence-specific DNA binding	16/610	115/19723	5.06223e-07	0.00122785
11	GO:0015293	MF	symporter activity	11/610	65/19723	4.44708e-06	0.00122785
62	GO:0007165	BP	signal transduction	62/610	1088/19723	5.25888e-06	0.00130173
10	GO:0030684	CC	preribosome	10/610	54/19723	5.21815e-06	0.00130173
26	GO:0055085	BP	transmembrane transport	26/610	328/19723	1.22796e-05	0.00272149
4	GO:0000050	BP	urea cycle	4/610	6/19723	1.29348e-05	0.00272149
4	GO:0006526	BP	arginine biosynthetic process	4/610	6/19723	1.29348e-05	0.00272149
4	GO:0004055	MF	argininosuccinate synthase activity	4/610	6/19723	1.29348e-05	0.00272149
8	GO:0044452	CC	nucleolar part	8/610	37/19723	1.39678e-05	0.00286715
140	GO:0065007	BP	biological regulation	140/610	3225/19723	2.20786e-05	0.00432125
363	GO:0008150	BP	biological_process	363/610	10075/19723	2.60823e-05	0.00498883
4	GO:0019627	BP	urea metabolic process	4/610	7/19723	2.94407e-05	0.00538637
28	GO:0048583	BP	regulation of response to stimulus	28/610	388/19723	3.65979e-05	0.00655336
49	GO:0022857	MF	transmembrane transporter activity	49/610	858/19723	4.34557e-05	0.00748165
9	GO:0015294	MF	solute:cation symporter activity	9/610	55/19723	4.356e-05	0.00748165
24	GO:0006520	BP	cellular amino acid metabolic process	24/610	319/19723	6.06849e-05	0.0102145
18	GO:1902531	BP	regulation of intracellular signal transduction	18/610	207/19723	8.16304e-05	0.0129623
125	GO:0050789	BP	regulation of biological process	125/610	2900/19723	9.39513e-05	0.0146425
21	GO:0022804	MF	active transmembrane transporter activity	21/610	268/19723	9.757e-05	0.01493
4	GO:0002224	BP	toll-like receptor signaling pathway	4/610	9/19723	0.000100857	0.01511
26	GO:0010646	BP	regulation of cell communication	26/610	370/19723	0.000102337	0.01511
26	GO:0023051	BP	regulation of signaling	26/610	371/19723	0.000106312	0.0154262
24	GO:0009966	BP	regulation of signal transduction	24/610	324/19723	0.000112247	0.0156181
3	GO:0008063	BP	Toll signaling pathway	3/610	4/19723	0.000115057	0.0156181
52	GO:0005215	MF	transporter activity	52/610	961/19723	0.000112055	0.0156181
3	GO:0047066	MF	phospholipid-hydroperoxide glutathione peroxidase activity	3/610	4/19723	0.000115057	0.0156181
7	GO:0015370	MF	solute:sodium symporter activity	7/610	37/19723	0.00012004	0.0160358
121	GO:0050794	BP	regulation of cellular process	121/610	2809/19723	0.000123741	0.016272
12	GO:0048584	BP	positive regulation of response to stimulus	12/610	108/19723	0.00012823	0.0163512
5	GO:0030687	CC	preribosome, large subunit precursor	5/610	17/19723	0.000126466	0.0163512
227	GO:0044425	CC	membrane part	227/610	5930/19723	0.000133496	0.0167687
11	GO:0030154	BP	cell differentiation	11/610	93/19723	0.000138696	0.0170884
21	GO:0034660	BP	ncRNA metabolic process	21/610	275/19723	0.000140102	0.0170884
4	GO:0071941	BP	nitrogen cycle metabolic process	4/610	10/19723	0.000163984	0.0196319
215	GO:0031224	CC	intrinsic component of membrane	215/610	5583/19723	0.000175997	0.0202903
4	GO:0002221	BP	pattern recognition receptor signaling pathway	4/610	11/19723	0.000251392	0.0278384
4	GO:0002758	BP	innate immune response-activating signal transduction	4/610	11/19723	0.000251392	0.0278384
6	GO:0009986	CC	cell surface	6/610	30/19723	0.000269022	0.0294037
3	GO:0000053	BP	argininosuccinate metabolic process	3/610	5/19723	0.000281013	0.0303206
6	GO:0005328	MF	neurotransmitter:sodium symporter activity	6/610	31/19723	0.000324944	0.0337621
6	GO:0005326	MF	neurotransmitter transporter activity	6/610	31/19723	0.000324944	0.0337621
4	GO:0002218	BP	activation of innate immune response	4/610	12/19723	0.000367884	0.0355875
212	GO:0016021	CC	integral component of membrane	212/610	5567/19723	0.000358475	0.0355875
4	GO:0005832	CC	chaperonin-containing T-complex	4/610	12/19723	0.000367884	0.0355875
4	GO:0030515	MF	snoRNA binding	4/610	12/19723	0.000367884	0.0355875
5	GO:0050778	BP	positive regulation of immune response	5/610	21/19723	0.000375337	0.0358959
12	GO:0006364	BP	rRNA processing	12/610	122/19723	0.000403743	0.0381787
9	GO:0009064	BP	glutamine family amino acid metabolic process	9/610	74/19723	0.000449957	0.042076
4	GO:0002764	BP	immune response-regulating signaling pathway	4/610	13/19723	0.000518432	0.0459276
4	GO:0045089	BP	positive regulation of innate immune response	4/610	13/19723	0.000518432	0.0459276
4	GO:0002757	BP	immune response-activating signal transduction	4/610	13/19723	0.000518432	0.0459276
10	GO:0016810	MF	hydrolase activity, acting on carbon-nitrogen (but not peptide) bonds	10/610	91/19723	0.000503569	0.0459276
103	GO:0097367	MF	carbohydrate derivative binding	103/610	2399/19723	0.000518132	0.0459276
8	GO:0043038	BP	amino acid activation	8/610	61/19723	0.000555497	0.0477048
8	GO:0043039	BP	tRNA aminoacylation	8/610	61/19723	0.000555497	0.0477048
5	GO:0002684	BP	positive regulation of immune system process	5/610	23/19723	0.000589699	0.0491377
5	GO:0051156	BP	glucose 6-phosphate metabolic process	5/610	23/19723	0.000589699	0.0491377
8	GO:0016875	MF	ligase activity, forming carbon-oxygen bonds	8/610	62/19723	0.000620803	0.0497588
8	GO:0016876	MF	ligase activity, forming aminoacyl-tRNA and related compounds	8/610	62/19723	0.000620803	0.0497588
8	GO:0004812	MF	aminoacyl-tRNA ligase activity	8/610	62/19723	0.000620803	0.0497588
4	GO:0031349	BP	positive regulation of defense response	4/610	14/19723	0.000708126	0.0551814
12	GO:0016072	BP	rRNA metabolic process	12/610	130/19723	0.00071735	0.0553873
15	GO:0031226	CC	intrinsic component of plasma membrane	15/610	187/19723	0.000733434	0.0561144
20	GO:0005576	CC	extracellular region	20/610	287/19723	0.000765486	0.058039
5	GO:0032040	CC	small-subunit processome	5/610	25/19723	0.000884736	0.0658933
5	GO:0036442	MF	hydrogen-exporting ATPase activity	5/610	25/19723	0.000884736	0.0658933
4	GO:0009725	BP	response to hormone	4/610	15/19723	0.000942131	0.0692901
2	GO:0034097	BP	response to cytokine	2/610	2/19723	0.000955044	0.0692901
2	GO:0035325	MF	Toll-like receptor binding	2/610	2/19723	0.000955044	0.0692901
108	GO:0043168	MF	anion binding	108/610	2601/19723	0.00124278	0.0886375
30	GO:0005829	CC	cytosol	30/610	526/19723	0.00126718	0.0888371
62	GO:0005737	CC	cytoplasm	62/610	1326/19723	0.00127463	0.0888371
62	GO:0016020	CC	membrane	62/610	1340/19723	0.00138658	0.0956511
19	GO:0032501	BP	multicellular organismal process	19/610	283/19723	0.00149331	0.102177
11	GO:0050793	BP	regulation of developmental process	11/610	123/19723	0.00152721	0.102824
260	GO:0044464	CC	cell part	260/610	7185/19723	0.00154363	0.103104
4	GO:0002253	BP	activation of immune response	4/610	17/19723	0.00156385	0.103633
109	GO:0036094	MF	small molecule binding	109/610	2643/19723	0.00164315	0.107593
9	GO:0023056	BP	positive regulation of signaling	9/610	89/19723	0.00171992	0.110495
9	GO:0010647	BP	positive regulation of cell communication	9/610	90/19723	0.00185983	0.116809
12	GO:0051082	MF	unfolded protein binding	12/610	145/19723	0.00185363	0.116809
4	GO:0045088	BP	regulation of innate immune response	4/610	18/19723	0.00196191	0.121662
6	GO:0000978	MF	RNA polymerase II core promoter proximal region sequence-specific DNA binding	6/610	43/19723	0.00196602	0.121662
7	GO:0006418	BP	tRNA aminoacylation for protein translation	7/610	58/19723	0.00200341	0.123071
7	GO:0080134	BP	regulation of response to stress	7/610	59/19723	0.00221367	0.134594
20	GO:0006357	BP	regulation of transcription from RNA polymerase II promoter	20/610	309/19723	0.00222297	0.134594
34	GO:0001071	MF	nucleic acid binding transcription factor activity	34/610	642/19723	0.00236091	0.140738
34	GO:0003700	MF	transcription factor activity, sequence-specific DNA binding	34/610	642/19723	0.00236091	0.140738
11	GO:0015291	MF	secondary active transmembrane transporter activity	11/610	130/19723	0.00237461	0.140738
4	GO:0032958	BP	inositol phosphate biosynthetic process	4/610	19/19723	0.00242488	0.140743
4	GO:0016755	MF	transferase activity, transferring amino-acyl groups	4/610	19/19723	0.00242488	0.140743
4	GO:0051087	MF	chaperone binding	4/610	19/19723	0.00242488	0.140743
6	GO:0001159	MF	core promoter proximal region DNA binding	6/610	45/19723	0.00249343	0.142753
6	GO:0000987	MF	core promoter proximal region sequence-specific DNA binding	6/610	45/19723	0.00249343	0.142753
17	GO:0044707	BP	single-multicellular organism process	17/610	252/19723	0.00261624	0.148772
10	GO:0000977	MF	RNA polymerase II regulatory region sequence-specific DNA binding	10/610	113/19723	0.00266084	0.150293
17	GO:0048869	BP	cellular developmental process	17/610	254/19723	0.00278977	0.1513
5	GO:0050776	BP	regulation of immune response	5/610	32/19723	0.00280622	0.1513
2	GO:0042493	BP	response to drug	2/610	3/19723	0.00280624	0.1513
2	GO:0018958	BP	phenol-containing compound metabolic process	2/610	3/19723	0.00280624	0.1513
49	GO:1902578	BP	single-organism localization	49/610	1024/19723	0.0028225	0.1513
2	GO:0097431	CC	mitotic spindle pole	2/610	3/19723	0.00280624	0.1513
2	GO:0034513	MF	box H/ACA snoRNA binding	2/610	3/19723	0.00280624	0.1513
2	GO:0003956	MF	NAD(P)+-protein-arginine ADP-ribosyltransferase activity	2/610	3/19723	0.00280624	0.1513
46	GO:0044765	BP	single-organism transport	46/610	958/19723	0.00293115	0.153732
3	GO:0002237	BP	response to molecule of bacterial origin	3/610	10/19723	0.00300267	0.153732
3	GO:0032496	BP	response to lipopolysaccharide	3/610	10/19723	0.00300267	0.153732
3	GO:0018149	BP	peptide cross-linking	3/610	10/19723	0.00300267	0.153732
10	GO:0006575	BP	cellular modified amino acid metabolic process	10/610	115/19723	0.0030246	0.153732
8	GO:0009967	BP	positive regulation of signal transduction	8/610	79/19723	0.00303226	0.153732
3	GO:0003810	MF	protein-glutamine gamma-glutamyltransferase activity	3/610	10/19723	0.00300267	0.153732
11	GO:0008509	MF	anion transmembrane transporter activity	11/610	134/19723	0.00300852	0.153732
10	GO:0001012	MF	RNA polymerase II regulatory region DNA binding	10/610	115/19723	0.0030246	0.153732
13	GO:0005887	CC	integral component of plasma membrane	13/610	175/19723	0.00317909	0.159257
5	GO:0005484	MF	SNAP receptor activity	5/610	33/19723	0.0032245	0.159695
4	GO:0031347	BP	regulation of defense response	4/610	21/19723	0.00356538	0.17389
4	GO:0046961	MF	proton-transporting ATPase activity, rotational mechanism	4/610	21/19723	0.00356538	0.17389
103	GO:1901265	MF	nucleoside phosphate binding	103/610	2533/19723	0.00377392	0.181493
103	GO:0000166	MF	nucleotide binding	103/610	2533/19723	0.00377392	0.181493
26	GO:0044767	BP	single-organism developmental process	26/610	463/19723	0.00380866	0.182123
3	GO:0032870	BP	cellular response to hormone stimulus	3/610	11/19723	0.00403441	0.188631
34	GO:0022891	MF	substrate-specific transmembrane transporter activity	34/610	662/19723	0.00399466	0.188631
18	GO:0007166	BP	cell surface receptor signaling pathway	18/610	276/19723	0.00407546	0.189497
28	GO:0032502	BP	developmental process	28/610	516/19723	0.00415691	0.192223
26	GO:0035556	BP	intracellular signal transduction	26/610	470/19723	0.00422085	0.194113
18	GO:0016874	MF	ligase activity	18/610	284/19723	0.00462775	0.210525
21	GO:0043565	MF	sequence-specific DNA binding	21/610	355/19723	0.00466114	0.210904
8	GO:0008061	MF	chitin binding	8/610	85/19723	0.00476376	0.214395
11	GO:0043492	MF	ATPase activity, coupled to movement of substances	11/610	143/19723	0.00493575	0.220954
4	GO:0008643	BP	carbohydrate transport	4/610	23/19723	0.00502358	0.221353
4	GO:0031225	CC	anchored component of membrane	4/610	23/19723	0.00502358	0.221353
4	GO:0008138	MF	protein tyrosine/serine/threonine phosphatase activity	4/610	23/19723	0.00502358	0.221353
5	GO:0009084	BP	glutamine family amino acid biosynthetic process	5/610	37/19723	0.00535203	0.231332
2	GO:0002755	BP	MyD88-dependent toll-like receptor signaling pathway	2/610	4/19723	0.00549743	0.231332
2	GO:0031118	BP	rRNA pseudouridine synthesis	2/610	4/19723	0.00549743	0.231332
2	GO:0072588	CC	box H/ACA RNP complex	2/610	4/19723	0.00549743	0.231332
2	GO:0005742	CC	mitochondrial outer membrane translocase complex	2/610	4/19723	0.00549743	0.231332
2	GO:0031429	CC	box H/ACA snoRNP complex	2/610	4/19723	0.00549743	0.231332
2	GO:0016813	MF	hydrolase activity, acting on carbon-nitrogen (but not peptide) bonds, in linear amidines	2/610	4/19723	0.00549743	0.231332
2	GO:0070976	MF	TIR domain binding	2/610	4/19723	0.00549743	0.231332
2	GO:0004630	MF	phospholipase D activity	2/610	4/19723	0.00549743	0.231332
9	GO:0006022	BP	aminoglycan metabolic process	9/610	107/19723	0.00596042	0.248331
92	GO:0032553	MF	ribonucleotide binding	92/610	2262/19723	0.00657281	0.272497
4	GO:0070585	BP	protein localization to mitochondrion	4/610	25/19723	0.00683515	0.279246
4	GO:0046173	BP	polyol biosynthetic process	4/610	25/19723	0.00683515	0.279246
7	GO:0032440	MF	2-alkenal reductase [NAD(P)] activity	7/610	72/19723	0.00678248	0.279246
8	GO:0006030	BP	chitin metabolic process	8/610	91/19723	0.00716811	0.289275
10	GO:0042626	MF	ATPase activity, coupled to transmembrane movement of substances	10/610	130/19723	0.00718376	0.289275
10	GO:0016820	MF	hydrolase activity, acting on acid anhydrides, catalyzing transmembrane movement of substances	10/610	130/19723	0.00718376	0.289275
26	GO:0098772	MF	molecular function regulator	26/610	488/19723	0.00743416	0.297933
5	GO:0002682	BP	regulation of immune system process	5/610	40/19723	0.00749019	0.298756
37	GO:0022892	MF	substrate-specific transporter activity	37/610	768/19723	0.00757197	0.300593
54	GO:0006810	BP	transport	54/610	1217/19723	0.00779901	0.308152
13	GO:0034220	BP	ion transmembrane transport	13/610	184/19723	0.00786527	0.308603
4	GO:0006739	BP	NADP metabolic process	4/610	26/19723	0.00788375	0.308603
31	GO:0019752	BP	carboxylic acid metabolic process	31/610	609/19723	0.00826977	0.320326
3	GO:0006098	BP	pentose-phosphate shunt	3/610	14/19723	0.00830618	0.320326
55	GO:0051234	BP	establishment of localization	55/610	1242/19723	0.00837354	0.320326
3	GO:0005732	CC	small nucleolar ribonucleoprotein complex	3/610	14/19723	0.00830618	0.320326
31	GO:0015075	MF	ion transmembrane transporter activity	31/610	611/19723	0.00836506	0.320326
21	GO:0044459	CC	plasma membrane part	21/610	368/19723	0.00860139	0.327554
2	GO:0010862	BP	positive regulation of pathway-restricted SMAD protein phosphorylation	2/610	5/19723	0.00897504	0.327668
2	GO:0043123	BP	positive regulation of I-kappaB kinase/NF-kappaB signaling	2/610	5/19723	0.00897504	0.327668
2	GO:0060395	BP	SMAD protein signal transduction	2/610	5/19723	0.00897504	0.327668
2	GO:0060393	BP	regulation of pathway-restricted SMAD protein phosphorylation	2/610	5/19723	0.00897504	0.327668
2	GO:0006658	BP	phosphatidylserine metabolic process	2/610	5/19723	0.00897504	0.327668
13	GO:0006457	BP	protein folding	13/610	191/19723	0.00901863	0.327668
4	GO:0044743	BP	intracellular protein transmembrane import	4/610	27/19723	0.00903267	0.327668
2	GO:0033176	CC	proton-transporting V-type ATPase complex	2/610	5/19723	0.00897504	0.327668
10	GO:0000976	MF	transcription regulatory region sequence-specific DNA binding	10/610	134/19723	0.00882104	0.327668
2	GO:0015321	MF	sodium-dependent phosphate transmembrane transporter activity	2/610	5/19723	0.00897504	0.327668
2	GO:0005160	MF	transforming growth factor beta receptor binding	2/610	5/19723	0.00897504	0.327668
5	GO:0009719	BP	response to endogenous stimulus	5/610	42/19723	0.00920778	0.332587
90	GO:0017076	MF	purine nucleotide binding	90/610	2236/19723	0.00930212	0.334558
31	GO:0043436	BP	oxoacid metabolic process	31/610	627/19723	0.00964621	0.345457
5	GO:0016763	MF	transferase activity, transferring pentosyl groups	5/610	43/19723	0.0101606	0.362339
4	GO:0072655	BP	establishment of protein localization to mitochondrion	4/610	28/19723	0.0102854	0.363024
4	GO:0007389	BP	pattern specification process	4/610	28/19723	0.0102854	0.363024
8	GO:1901071	BP	glucosamine-containing compound metabolic process	8/610	97/19723	0.0103909	0.363024
8	GO:0009605	BP	response to external stimulus	8/610	97/19723	0.0103909	0.363024
6	GO:0045087	BP	innate immune response	6/610	60/19723	0.0103955	0.363024
10	GO:0015405	MF	P-P-bond-hydrolysis-driven transmembrane transporter activity	10/610	138/19723	0.0107302	0.370377
10	GO:0015399	MF	primary active transmembrane transporter activity	10/610	138/19723	0.0107302	0.370377
58	GO:0051179	BP	localization	58/610	1346/19723	0.0111451	0.382447
5	GO:0005759	CC	mitochondrial matrix	5/610	44/19723	0.0111789	0.382447
89	GO:0032555	MF	purine ribonucleotide binding	89/610	2232/19723	0.0112955	0.383319
13	GO:0034470	BP	ncRNA processing	13/610	200/19723	0.011371	0.383533
8	GO:0006040	BP	amino sugar metabolic process	8/610	99/19723	0.0116726	0.391382
6	GO:1901617	BP	organic hydroxy compound biosynthetic process	6/610	62/19723	0.0121248	0.399711
30	GO:1901135	BP	carbohydrate derivative metabolic process	30/610	610/19723	0.0121358	0.399711
3	GO:0030182	BP	neuron differentiation	3/610	16/19723	0.012206	0.399711
3	GO:0051093	BP	negative regulation of developmental process	3/610	16/19723	0.012206	0.399711
3	GO:0001522	BP	pseudouridine synthesis	3/610	16/19723	0.012206	0.399711
3	GO:0004602	MF	glutathione peroxidase activity	3/610	16/19723	0.012206	0.399711
24	GO:0044712	BP	single-organism catabolic process	24/610	457/19723	0.0127799	0.415274
50	GO:0044281	BP	small molecule metabolic process	50/610	1137/19723	0.0130753	0.417257
4	GO:0043647	BP	inositol phosphate metabolic process	4/610	30/19723	0.0131155	0.417257
2	GO:0000055	BP	ribosomal large subunit export from nucleus	2/610	6/19723	0.013188	0.417257
2	GO:0043122	BP	regulation of I-kappaB kinase/NF-kappaB signaling	2/610	6/19723	0.013188	0.417257
88	GO:0032549	MF	ribonucleoside binding	88/610	2206/19723	0.012956	0.417257
88	GO:0001882	MF	nucleoside binding	88/610	2210/19723	0.0130619	0.417257
4	GO:0015108	MF	chloride transmembrane transporter activity	4/610	30/19723	0.0131155	0.417257
7	GO:0015081	MF	sodium ion transmembrane transporter activity	7/610	82/19723	0.0134669	0.424483
3	GO:0000154	BP	rRNA modification	3/610	17/19723	0.0144865	0.451477
3	GO:0033993	BP	response to lipid	3/610	17/19723	0.0144865	0.451477
4	GO:0071806	BP	protein transmembrane transport	4/610	31/19723	0.0146987	0.451477
4	GO:0071495	BP	cellular response to endogenous stimulus	4/610	31/19723	0.0146987	0.451477
4	GO:0065002	BP	intracellular protein transmembrane transport	4/610	31/19723	0.0146987	0.451477
4	GO:0006458	BP	'de novo' protein folding	4/610	31/19723	0.0146987	0.451477
8	GO:0004620	MF	phospholipase activity	8/610	103/19723	0.0145797	0.451477
87	GO:0035639	MF	purine ribonucleoside triphosphate binding	87/610	2194/19723	0.0153272	0.469067
87	GO:0001883	MF	purine nucleoside binding	87/610	2201/19723	0.015591	0.473695
87	GO:0032550	MF	purine ribonucleoside binding	87/610	2201/19723	0.015591	0.473695
5	GO:1990542	BP	mitochondrial transmembrane transport	5/610	48/19723	0.0159446	0.480967
7	GO:0045595	BP	regulation of cell differentiation	7/610	85/19723	0.0161665	0.485919
4	GO:0010243	BP	response to organonitrogen compound	4/610	32/19723	0.0163977	0.491114
3	GO:0001228	MF	transcriptional activator activity, RNA polymerase II transcription regulatory region sequence-specific binding	3/610	18/19723	0.0169914	0.50709
5	GO:0046165	BP	alcohol biosynthetic process	5/610	49/19723	0.0173181	0.50742
2	GO:0000054	BP	ribosomal subunit export from nucleus	2/610	7/19723	0.0180877	0.50742
2	GO:0016074	BP	snoRNA metabolic process	2/610	7/19723	0.0180877	0.50742
2	GO:0046209	BP	nitric oxide metabolic process	2/610	7/19723	0.0180877	0.50742
2	GO:0006527	BP	arginine catabolic process	2/610	7/19723	0.0180877	0.50742
2	GO:0006809	BP	nitric oxide biosynthetic process	2/610	7/19723	0.0180877	0.50742
2	GO:0006751	BP	glutathione catabolic process	2/610	7/19723	0.0180877	0.50742
2	GO:0071426	BP	ribonucleoprotein complex export from nucleus	2/610	7/19723	0.0180877	0.50742
2	GO:0071428	BP	rRNA-containing ribonucleoprotein complex export from nucleus	2/610	7/19723	0.0180877	0.50742
2	GO:0009952	BP	anterior/posterior pattern specification	2/610	7/19723	0.0180877	0.50742
2	GO:0033750	BP	ribosome localization	2/610	7/19723	0.0180877	0.50742
2	GO:0033753	BP	establishment of ribosome localization	2/610	7/19723	0.0180877	0.50742
2	GO:0006954	BP	inflammatory response	2/610	7/19723	0.0180877	0.50742
19	GO:0030234	MF	enzyme regulator activity	19/610	347/19723	0.0172536	0.50742
8	GO:0022853	MF	active ion transmembrane transporter activity	8/610	107/19723	0.0179804	0.50742
2	GO:0022884	MF	macromolecule transmembrane transporter activity	2/610	7/19723	0.0180877	0.50742
2	GO:0008320	MF	protein transmembrane transporter activity	2/610	7/19723	0.0180877	0.50742
2	GO:0004517	MF	nitric-oxide synthase activity	2/610	7/19723	0.0180877	0.50742
4	GO:1901698	BP	response to nitrogen compound	4/610	33/19723	0.0182147	0.509285
11	GO:0098655	BP	cation transmembrane transport	11/610	163/19723	0.0185117	0.515875
33	GO:0016070	BP	RNA metabolic process	33/610	700/19723	0.018709	0.517862
5	GO:0009607	BP	response to biotic stimulus	5/610	50/19723	0.0187676	0.517862
5	GO:0043207	BP	response to external biotic stimulus	5/610	50/19723	0.0187676	0.517862
11	GO:0098660	BP	inorganic ion transmembrane transport	11/610	164/19723	0.0188752	0.51913
7	GO:0007005	BP	mitochondrion organization	7/610	88/19723	0.0192287	0.52713
3	GO:0090092	BP	regulation of transmembrane receptor protein serine/threonine kinase signaling pathway	3/610	19/19723	0.0197226	0.529608
9	GO:0006399	BP	tRNA metabolic process	9/610	130/19723	0.0197441	0.529608
6	GO:1901700	BP	response to oxygen-containing compound	6/610	69/19723	0.0197596	0.529608
6	GO:0006839	BP	mitochondrial transport	6/610	69/19723	0.0197596	0.529608
6	GO:0071310	BP	cellular response to organic substance	6/610	69/19723	0.0197596	0.529608
3	GO:0005544	MF	calcium-dependent phospholipid binding	3/610	19/19723	0.0197226	0.529608
6	GO:0015103	MF	inorganic anion transmembrane transporter activity	6/610	69/19723	0.0197596	0.529608
4	GO:0015991	BP	ATP hydrolysis coupled proton transport	4/610	34/19723	0.0201518	0.535009
4	GO:0090662	BP	ATP hydrolysis coupled transmembrane transport	4/610	34/19723	0.0201518	0.535009
4	GO:1901505	MF	carbohydrate derivative transporter activity	4/610	34/19723	0.0201518	0.535009
7	GO:0002376	BP	immune system process	7/610	89/19723	0.0203338	0.538143
31	GO:0006082	BP	organic acid metabolic process	31/610	658/19723	0.0211338	0.543409
5	GO:0051604	BP	protein maturation	5/610	53/19723	0.0235873	0.543409
2	GO:1901264	BP	carbohydrate derivative transport	2/610	8/19723	0.0236277	0.543409
2	GO:0046890	BP	regulation of lipid biosynthetic process	2/610	8/19723	0.0236277	0.543409
4	GO:0015988	BP	energy coupled proton transmembrane transport, against electrochemical gradient	4/610	36/19723	0.0243941	0.543409
7	GO:0070887	BP	cellular response to chemical stimulus	7/610	93/19723	0.0251967	0.543409
3	GO:0046777	BP	protein autophosphorylation	3/610	21/19723	0.0258671	0.543409
3	GO:0032101	BP	regulation of response to external stimulus	3/610	21/19723	0.0258671	0.543409
7	GO:0010033	BP	response to organic substance	7/610	94/19723	0.0265266	0.543409
8	GO:1901615	BP	organic hydroxy compound metabolic process	8/610	117/19723	0.0289017	0.543409
4	GO:0009314	BP	response to radiation	4/610	38/19723	0.0291367	0.543409
25	GO:0005975	BP	carbohydrate metabolic process	25/610	523/19723	0.0291548	0.543409
3	GO:0006906	BP	vesicle fusion	3/610	22/19723	0.0292799	0.543409
3	GO:0009072	BP	aromatic amino acid family metabolic process	3/610	22/19723	0.0292799	0.543409
2	GO:0010822	BP	positive regulation of mitochondrion organization	2/610	9/19723	0.0297639	0.543409
2	GO:0090100	BP	positive regulation of transmembrane receptor protein serine/threonine kinase signaling pathway	2/610	9/19723	0.0297639	0.543409
2	GO:0042430	BP	indole-containing compound metabolic process	2/610	9/19723	0.0297639	0.543409
2	GO:0009312	BP	oligosaccharide biosynthetic process	2/610	9/19723	0.0297639	0.543409
2	GO:0051591	BP	response to cAMP	2/610	9/19723	0.0297639	0.543409
10	GO:0098662	BP	inorganic cation transmembrane transport	10/610	156/19723	0.0306901	0.543409
1	GO:0006361	BP	transcription initiation from RNA polymerase I promoter	1/610	1/19723	0.0309284	0.543409
1	GO:0006106	BP	fumarate metabolic process	1/610	1/19723	0.0309284	0.543409
1	GO:0030382	BP	sperm mitochondrion organization	1/610	1/19723	0.0309284	0.543409
1	GO:0070589	BP	cellular component macromolecule biosynthetic process	1/610	1/19723	0.0309284	0.543409
1	GO:0048076	BP	regulation of compound eye pigmentation	1/610	1/19723	0.0309284	0.543409
1	GO:0048075	BP	positive regulation of eye pigmentation	1/610	1/19723	0.0309284	0.543409
1	GO:0048070	BP	regulation of developmental pigmentation	1/610	1/19723	0.0309284	0.543409
1	GO:0031506	BP	cell wall glycoprotein biosynthetic process	1/610	1/19723	0.0309284	0.543409
1	GO:0051180	BP	vitamin transport	1/610	1/19723	0.0309284	0.543409
1	GO:0006581	BP	acetylcholine catabolic process	1/610	1/19723	0.0309284	0.543409
1	GO:0051971	BP	positive regulation of transmission of nerve impulse	1/610	1/19723	0.0309284	0.543409
1	GO:0008217	BP	regulation of blood pressure	1/610	1/19723	0.0309284	0.543409
1	GO:1901999	BP	homogentisate metabolic process	1/610	1/19723	0.0309284	0.543409
1	GO:0010823	BP	negative regulation of mitochondrion organization	1/610	1/19723	0.0309284	0.543409
1	GO:0061138	BP	morphogenesis of a branching epithelium	1/610	1/19723	0.0309284	0.543409
1	GO:0019547	BP	arginine catabolic process to ornithine	1/610	1/19723	0.0309284	0.543409
1	GO:0000032	BP	cell wall mannoprotein biosynthetic process	1/610	1/19723	0.0309284	0.543409
1	GO:0006572	BP	tyrosine catabolic process	1/610	1/19723	0.0309284	0.543409
1	GO:0072334	BP	UDP-galactose transmembrane transport	1/610	1/19723	0.0309284	0.543409
1	GO:1904059	BP	regulation of locomotor rhythm	1/610	1/19723	0.0309284	0.543409
1	GO:0014066	BP	regulation of phosphatidylinositol 3-kinase signaling	1/610	1/19723	0.0309284	0.543409
1	GO:0006057	BP	mannoprotein biosynthetic process	1/610	1/19723	0.0309284	0.543409
1	GO:0006056	BP	mannoprotein metabolic process	1/610	1/19723	0.0309284	0.543409
1	GO:0045176	BP	apical protein localization	1/610	1/19723	0.0309284	0.543409
1	GO:0010635	BP	regulation of mitochondrial fusion	1/610	1/19723	0.0309284	0.543409
1	GO:0010637	BP	negative regulation of mitochondrial fusion	1/610	1/19723	0.0309284	0.543409
1	GO:0044038	BP	cell wall macromolecule biosynthetic process	1/610	1/19723	0.0309284	0.543409
1	GO:0019243	BP	methylglyoxal catabolic process to D-lactate via S-lactoyl-glutathione	1/610	1/19723	0.0309284	0.543409
1	GO:0045760	BP	positive regulation of action potential	1/610	1/19723	0.0309284	0.543409
1	GO:0042135	BP	neurotransmitter catabolic process	1/610	1/19723	0.0309284	0.543409
1	GO:0046329	BP	negative regulation of JNK cascade	1/610	1/19723	0.0309284	0.543409
1	GO:0070221	BP	sulfide oxidation, using sulfide:quinone oxidoreductase	1/610	1/19723	0.0309284	0.543409
1	GO:0006216	BP	cytidine catabolic process	1/610	1/19723	0.0309284	0.543409
1	GO:0009438	BP	methylglyoxal metabolic process	1/610	1/19723	0.0309284	0.543409
1	GO:1903352	BP	L-ornithine transmembrane transport	1/610	1/19723	0.0309284	0.543409
1	GO:0046189	BP	phenol-containing compound biosynthetic process	1/610	1/19723	0.0309284	0.543409
1	GO:0048078	BP	positive regulation of compound eye pigmentation	1/610	1/19723	0.0309284	0.543409
1	GO:0048073	BP	regulation of eye pigmentation	1/610	1/19723	0.0309284	0.543409
1	GO:0072531	BP	pyrimidine-containing compound transmembrane transport	1/610	1/19723	0.0309284	0.543409
1	GO:1901160	BP	primary amino compound metabolic process	1/610	1/19723	0.0309284	0.543409
1	GO:1901162	BP	primary amino compound biosynthetic process	1/610	1/19723	0.0309284	0.543409
1	GO:0046087	BP	cytidine metabolic process	1/610	1/19723	0.0309284	0.543409
1	GO:0015889	BP	cobalamin transport	1/610	1/19723	0.0309284	0.543409
1	GO:0006654	BP	phosphatidic acid biosynthetic process	1/610	1/19723	0.0309284	0.543409
1	GO:0046473	BP	phosphatidic acid metabolic process	1/610	1/19723	0.0309284	0.543409
1	GO:0001763	BP	morphogenesis of a branching structure	1/610	1/19723	0.0309284	0.543409
1	GO:0019418	BP	sulfide oxidation	1/610	1/19723	0.0309284	0.543409
1	GO:1902000	BP	homogentisate catabolic process	1/610	1/19723	0.0309284	0.543409
1	GO:0048087	BP	positive regulation of developmental pigmentation	1/610	1/19723	0.0309284	0.543409
1	GO:1904457	BP	positive regulation of neuronal action potential	1/610	1/19723	0.0309284	0.543409
1	GO:0015822	BP	ornithine transport	1/610	1/19723	0.0309284	0.543409
1	GO:0000066	BP	mitochondrial ornithine transport	1/610	1/19723	0.0309284	0.543409
1	GO:0000454	BP	snoRNA guided rRNA pseudouridine synthesis	1/610	1/19723	0.0309284	0.543409
1	GO:0015785	BP	UDP-galactose transport	1/610	1/19723	0.0309284	0.543409
1	GO:0019556	BP	histidine catabolic process to glutamate and formamide	1/610	1/19723	0.0309284	0.543409
1	GO:0019557	BP	histidine catabolic process to glutamate and formate	1/610	1/19723	0.0309284	0.543409
1	GO:1904061	BP	positive regulation of locomotor rhythm	1/610	1/19723	0.0309284	0.543409
1	GO:0048168	BP	regulation of neuronal synaptic plasticity	1/610	1/19723	0.0309284	0.543409
1	GO:0061727	BP	methylglyoxal catabolic process to lactate	1/610	1/19723	0.0309284	0.543409
1	GO:0043606	BP	formamide metabolic process	1/610	1/19723	0.0309284	0.543409
1	GO:0007430	BP	terminal branching, open tracheal system	1/610	1/19723	0.0309284	0.543409
1	GO:0060446	BP	branching involved in open tracheal system development	1/610	1/19723	0.0309284	0.543409
1	GO:0031637	BP	regulation of neuronal synaptic plasticity in response to neurotrophin	1/610	1/19723	0.0309284	0.543409
1	GO:0016540	BP	protein autoprocessing	1/610	1/19723	0.0309284	0.543409
1	GO:0015942	BP	formate metabolic process	1/610	1/19723	0.0309284	0.543409
1	GO:0046135	BP	pyrimidine nucleoside catabolic process	1/610	1/19723	0.0309284	0.543409
1	GO:0046133	BP	pyrimidine ribonucleoside catabolic process	1/610	1/19723	0.0309284	0.543409
1	GO:0031646	BP	positive regulation of neurological system process	1/610	1/19723	0.0309284	0.543409
1	GO:0009972	BP	cytidine deamination	1/610	1/19723	0.0309284	0.543409
1	GO:0045776	BP	negative regulation of blood pressure	1/610	1/19723	0.0309284	0.543409
1	GO:0034219	BP	carbohydrate transmembrane transport	1/610	1/19723	0.0309284	0.543409
1	GO:0006430	BP	lysyl-tRNA aminoacylation	1/610	1/19723	0.0309284	0.543409
1	GO:0048754	BP	branching morphogenesis of an epithelial tube	1/610	1/19723	0.0309284	0.543409
1	GO:0019336	BP	phenol-containing compound catabolic process	1/610	1/19723	0.0309284	0.543409
1	GO:0051596	BP	methylglyoxal catabolic process	1/610	1/19723	0.0309284	0.543409
1	GO:1990575	BP	mitochondrial L-ornithine transmembrane transport	1/610	1/19723	0.0309284	0.543409
1	GO:0042427	BP	serotonin biosynthetic process	1/610	1/19723	0.0309284	0.543409
1	GO:0001507	BP	acetylcholine catabolic process in synaptic cleft	1/610	1/19723	0.0309284	0.543409
1	GO:0090481	BP	pyrimidine nucleotide-sugar transmembrane transport	1/610	1/19723	0.0309284	0.543409
1	GO:0042428	BP	serotonin metabolic process	1/610	1/19723	0.0309284	0.543409
3	GO:0005741	CC	mitochondrial outer membrane	3/610	20/19723	0.0226811	0.543409
3	GO:0031968	CC	organelle outer membrane	3/610	20/19723	0.0226811	0.543409
8	GO:0098805	CC	whole membrane	8/610	116/19723	0.0276428	0.543409
1	GO:0034455	CC	t-UTP complex	1/610	1/19723	0.0309284	0.543409
1	GO:0043083	CC	synaptic cleft	1/610	1/19723	0.0309284	0.543409
1	GO:1990745	CC	EARP complex	1/610	1/19723	0.0309284	0.543409
4	GO:0015932	MF	nucleobase-containing compound transmembrane transporter activity	4/610	35/19723	0.0222111	0.543409
6	GO:0019829	MF	cation-transporting ATPase activity	6/610	71/19723	0.022431	0.543409
6	GO:0042625	MF	ATPase coupled ion transmembrane transporter activity	6/610	71/19723	0.022431	0.543409
6	GO:0019199	MF	transmembrane receptor protein kinase activity	6/610	71/19723	0.022431	0.543409
7	GO:0016628	MF	oxidoreductase activity, acting on the CH-CH group of donors, NAD or NADP as acceptor	7/610	91/19723	0.0226753	0.543409
3	GO:0016814	MF	hydrolase activity, acting on carbon-nitrogen (but not peptide) bonds, in cyclic amidines	3/610	20/19723	0.0226811	0.543409
2	GO:0017017	MF	MAP kinase tyrosine/serine/threonine phosphatase activity	2/610	8/19723	0.0236277	0.543409
2	GO:0031404	MF	chloride ion binding	2/610	8/19723	0.0236277	0.543409
2	GO:0015377	MF	cation:chloride symporter activity	2/610	8/19723	0.0236277	0.543409
2	GO:0015114	MF	phosphate ion transmembrane transporter activity	2/610	8/19723	0.0236277	0.543409
2	GO:0005126	MF	cytokine receptor binding	2/610	8/19723	0.0236277	0.543409
18	GO:0004888	MF	transmembrane signaling receptor activity	18/610	339/19723	0.025202	0.543409
8	GO:0016298	MF	lipase activity	8/610	115/19723	0.0264224	0.543409
4	GO:0008375	MF	acetylglucosaminyltransferase activity	4/610	37/19723	0.0267022	0.543409
18	GO:0099600	MF	transmembrane receptor activity	18/610	343/19723	0.0267125	0.543409
2	GO:0033549	MF	MAP kinase phosphatase activity	2/610	9/19723	0.0297639	0.543409
1	GO:0097177	MF	mitochondrial ribosome binding	1/610	1/19723	0.0309284	0.543409
1	GO:0052862	MF	glucan endo-1,4-beta-glucanase activity, C-3 substituted reducing group	1/610	1/19723	0.0309284	0.543409
1	GO:0052861	MF	glucan endo-1,3-beta-glucanase activity, C-3 substituted reducing group	1/610	1/19723	0.0309284	0.543409
1	GO:0016206	MF	catechol O-methyltransferase activity	1/610	1/19723	0.0309284	0.543409
1	GO:0003934	MF	GTP cyclohydrolase I activity	1/610	1/19723	0.0309284	0.543409
1	GO:0004061	MF	arylformamidase activity	1/610	1/19723	0.0309284	0.543409
1	GO:0008999	MF	ribosomal-protein-alanine N-acetyltransferase activity	1/610	1/19723	0.0309284	0.543409
1	GO:0035529	MF	NADH pyrophosphatase activity	1/610	1/19723	0.0309284	0.543409
1	GO:0004333	MF	fumarate hydratase activity	1/610	1/19723	0.0309284	0.543409
1	GO:0070224	MF	sulfide:quinone oxidoreductase activity	1/610	1/19723	0.0309284	0.543409
1	GO:0001181	MF	transcription factor activity, core RNA polymerase I binding	1/610	1/19723	0.0309284	0.543409
1	GO:0004164	MF	diphthine synthase activity	1/610	1/19723	0.0309284	0.543409
1	GO:0032542	MF	sulfiredoxin activity	1/610	1/19723	0.0309284	0.543409
1	GO:0004824	MF	lysine-tRNA ligase activity	1/610	1/19723	0.0309284	0.543409
1	GO:0047131	MF	saccharopine dehydrogenase (NAD+, L-glutamate-forming) activity	1/610	1/19723	0.0309284	0.543409
1	GO:0004476	MF	mannose-6-phosphate isomerase activity	1/610	1/19723	0.0309284	0.543409
1	GO:0005460	MF	UDP-glucose transmembrane transporter activity	1/610	1/19723	0.0309284	0.543409
1	GO:0035299	MF	inositol pentakisphosphate 2-kinase activity	1/610	1/19723	0.0309284	0.543409
1	GO:0004753	MF	saccharopine dehydrogenase activity	1/610	1/19723	0.0309284	0.543409
1	GO:0000064	MF	L-ornithine transmembrane transporter activity	1/610	1/19723	0.0309284	0.543409
1	GO:0009032	MF	thymidine phosphorylase activity	1/610	1/19723	0.0309284	0.543409
1	GO:0052736	MF	beta-glucanase activity	1/610	1/19723	0.0309284	0.543409
1	GO:0004034	MF	aldose 1-epimerase activity	1/610	1/19723	0.0309284	0.543409
1	GO:0001042	MF	RNA polymerase I core binding	1/610	1/19723	0.0309284	0.543409
1	GO:0004053	MF	arginase activity	1/610	1/19723	0.0309284	0.543409
1	GO:0042973	MF	glucan endo-1,3-beta-D-glucosidase activity	1/610	1/19723	0.0309284	0.543409
1	GO:0004510	MF	tryptophan 5-monooxygenase activity	1/610	1/19723	0.0309284	0.543409
1	GO:0050480	MF	imidazolonepropionase activity	1/610	1/19723	0.0309284	0.543409
1	GO:0016154	MF	pyrimidine-nucleoside phosphorylase activity	1/610	1/19723	0.0309284	0.543409
1	GO:0071566	MF	UFM1 activating enzyme activity	1/610	1/19723	0.0309284	0.543409
1	GO:0004326	MF	tetrahydrofolylpolyglutamate synthase activity	1/610	1/19723	0.0309284	0.543409
1	GO:0004609	MF	phosphatidylserine decarboxylase activity	1/610	1/19723	0.0309284	0.543409
4	GO:0019932	BP	second-messenger-mediated signaling	4/610	39/19723	0.0316984	0.554624
4	GO:1902533	BP	positive regulation of intracellular signal transduction	4/610	39/19723	0.0316984	0.554624
26	GO:0048518	BP	positive regulation of biological process	26/610	551/19723	0.0328203	0.565389
3	GO:0019682	BP	glyceraldehyde-3-phosphate metabolic process	3/610	23/19723	0.0329183	0.565389
3	GO:0098656	BP	anion transmembrane transport	3/610	23/19723	0.0329183	0.565389
3	GO:0031647	BP	regulation of protein stability	3/610	23/19723	0.0329183	0.565389
3	GO:0090174	BP	organelle membrane fusion	3/610	23/19723	0.0329183	0.565389
10	GO:0000975	MF	regulatory region DNA binding	10/610	159/19723	0.032894	0.565389
10	GO:0044212	MF	transcription regulatory region DNA binding	10/610	159/19723	0.032894	0.565389
10	GO:0001067	MF	regulatory region nucleic acid binding	10/610	159/19723	0.032894	0.565389
3	GO:0008083	MF	growth factor activity	3/610	23/19723	0.0329183	0.565389
6	GO:0031974	CC	membrane-enclosed lumen	6/610	78/19723	0.0336612	0.575798
4	GO:0043408	BP	regulation of MAPK cascade	4/610	40/19723	0.0343882	0.58467
4	GO:0006081	BP	cellular aldehyde metabolic process	4/610	40/19723	0.0343882	0.58467
4	GO:0005516	MF	calmodulin binding	4/610	40/19723	0.0343882	0.58467
10	GO:1990837	MF	sequence-specific double-stranded DNA binding	10/610	161/19723	0.0345312	0.585917
5	GO:0072350	BP	tricarboxylic acid metabolic process	5/610	59/19723	0.0354557	0.591872
5	GO:0097485	BP	neuron projection guidance	5/610	59/19723	0.0354557	0.591872
5	GO:0007411	BP	axon guidance	5/610	59/19723	0.0354557	0.591872
6	GO:0035023	BP	regulation of Rho protein signal transduction	6/610	79/19723	0.035515	0.591872
6	GO:0006955	BP	immune response	6/610	79/19723	0.035515	0.591872
5	GO:0070013	CC	intracellular organelle lumen	5/610	59/19723	0.0354557	0.591872
5	GO:0043233	CC	organelle lumen	5/610	59/19723	0.0354557	0.591872
7	GO:0044437	CC	vacuolar part	7/610	100/19723	0.0355152	0.591872
38	GO:0009889	BP	regulation of biosynthetic process	38/610	881/19723	0.0363861	0.59457
2	GO:0006471	BP	protein ADP-ribosylation	2/610	10/19723	0.0364542	0.59457
2	GO:2001057	BP	reactive nitrogen species metabolic process	2/610	10/19723	0.0364542	0.59457
2	GO:0034982	BP	mitochondrial protein processing	2/610	10/19723	0.0364542	0.59457
2	GO:0055075	BP	potassium ion homeostasis	2/610	10/19723	0.0364542	0.59457
2	GO:0071482	BP	cellular response to light stimulus	2/610	10/19723	0.0364542	0.59457
2	GO:0050954	BP	sensory perception of mechanical stimulus	2/610	10/19723	0.0364542	0.59457
2	GO:0007605	BP	sensory perception of sound	2/610	10/19723	0.0364542	0.59457
2	GO:0005736	CC	DNA-directed RNA polymerase I complex	2/610	10/19723	0.0364542	0.59457
2	GO:0098799	CC	outer mitochondrial membrane protein complex	2/610	10/19723	0.0364542	0.59457
2	GO:0004896	MF	cytokine receptor activity	2/610	10/19723	0.0364542	0.59457
12	GO:1901605	BP	alpha-amino acid metabolic process	12/610	203/19723	0.0368285	0.594911
3	GO:0019867	CC	outer membrane	3/610	24/19723	0.0367805	0.594911
3	GO:0030173	CC	integral component of Golgi membrane	3/610	24/19723	0.0367805	0.594911
3	GO:0031228	CC	intrinsic component of Golgi membrane	3/610	24/19723	0.0367805	0.594911
22	GO:0008324	MF	cation transmembrane transporter activity	22/610	449/19723	0.0367305	0.594911
5	GO:0003713	MF	transcription coactivator activity	5/610	60/19723	0.0377339	0.607206
5	GO:0004714	MF	transmembrane receptor protein tyrosine kinase activity	5/610	60/19723	0.0377339	0.607206
71	GO:0030554	MF	adenyl nucleotide binding	71/610	1809/19723	0.0383921	0.616506
4	GO:0016485	BP	protein processing	4/610	42/19723	0.0401539	0.642462
3	GO:0031201	CC	SNARE complex	3/610	25/19723	0.040864	0.648889
3	GO:0015605	MF	organophosphate ester transmembrane transporter activity	3/610	25/19723	0.040864	0.648889
3	GO:0015215	MF	nucleotide transmembrane transporter activity	3/610	25/19723	0.040864	0.648889
10	GO:0044282	BP	small molecule catabolic process	10/610	168/19723	0.0413374	0.65517
2	GO:0050830	BP	defense response to Gram-positive bacterium	2/610	11/19723	0.0436586	0.674184
2	GO:0043171	BP	peptide catabolic process	2/610	11/19723	0.0436586	0.674184
2	GO:0010821	BP	regulation of mitochondrion organization	2/610	11/19723	0.0436586	0.674184
2	GO:0046683	BP	response to organophosphorus	2/610	11/19723	0.0436586	0.674184
2	GO:0009074	BP	aromatic amino acid family catabolic process	2/610	11/19723	0.0436586	0.674184
2	GO:0014074	BP	response to purine-containing compound	2/610	11/19723	0.0436586	0.674184
2	GO:0009583	BP	detection of light stimulus	2/610	11/19723	0.0436586	0.674184
2	GO:0007602	BP	phototransduction	2/610	11/19723	0.0436586	0.674184
2	GO:0009612	BP	response to mechanical stimulus	2/610	11/19723	0.0436586	0.674184
12	GO:0008289	MF	lipid binding	12/610	213/19723	0.0430781	0.674184
4	GO:0004683	MF	calmodulin-dependent protein kinase activity	4/610	43/19723	0.0432301	0.674184
2	GO:0001227	MF	transcriptional repressor activity, RNA polymerase II transcription regulatory region sequence-specific binding	2/610	11/19723	0.0436586	0.674184
2	GO:0015165	MF	pyrimidine nucleotide-sugar transmembrane transporter activity	2/610	11/19723	0.0436586	0.674184
2	GO:0004185	MF	serine-type carboxypeptidase activity	2/610	11/19723	0.0436586	0.674184
7	GO:0030414	MF	peptidase inhibitor activity	7/610	105/19723	0.0443875	0.684185
3	GO:0051084	BP	'de novo' posttranslational protein folding	3/610	27/19723	0.0496824	0.751537
3	GO:0051085	BP	chaperone mediated protein folding requiring cofactor	3/610	27/19723	0.0496824	0.751537
4	GO:0019751	BP	polyol metabolic process	4/610	45/19723	0.0497689	0.751537
3	GO:1901677	MF	phosphate transmembrane transporter activity	3/610	27/19723	0.0496824	0.751537

## Sheet: Up-regulated_KEGG_pathways_12h
Num	Pathway id	Description	Database	Ratio_in_study	Ratio_in_pop	Pvalue_uncorrected	Pvalue_corrected	First Category	Second Category
12	map05140	Leishmaniasis	KEGG PATHWAY	12/410	59/13589	1.50372e-07	3.95479e-05	Human Diseases	Infectious diseases: Parasitic
14	map05133	Pertussis	KEGG PATHWAY	14/410	88/13589	3.49301e-07	4.59331e-05	Human Diseases	Infectious diseases: Bacterial
12	map04624	Toll and Imd signaling pathway	KEGG PATHWAY	12/410	80/13589	4.56643e-06	0.000300243	Organismal Systems	Immune system
14	map05142	Chagas disease (American trypanosomiasis)	KEGG PATHWAY	14/410	107/13589	3.92234e-06	0.000343859	Human Diseases	Infectious diseases: Parasitic
15	map05146	Amoebiasis	KEGG PATHWAY	15/410	131/13589	9.47754e-06	0.000498519	Human Diseases	Infectious diseases: Parasitic
8	map04064	NF-kappa B signaling pathway	KEGG PATHWAY	8/410	47/13589	7.18307e-05	0.00314858	Environmental Information Processing	Signal transduction
13	map05231	Choline metabolism in cancer	KEGG PATHWAY	13/410	131/13589	0.00016372	0.00538228	Human Diseases	Cancers: Overview
10	map04620	Toll-like receptor signaling pathway	KEGG PATHWAY	10/410	81/13589	0.000155478	0.00584152	Organismal Systems	Immune system
5	map05321	Inflammatory bowel disease (IBD)	KEGG PATHWAY	5/410	20/13589	0.000260021	0.00759839	Human Diseases	Immune diseases
8	map05030	Cocaine addiction	KEGG PATHWAY	8/410	57/13589	0.00029016	0.0076312	Human Diseases	Substance dependence
13	map04928	Parathyroid hormone synthesis, secretion and action	KEGG PATHWAY	13/410	142/13589	0.000363905	0.00870065	Organismal Systems	Endocrine system
13	map04625	C-type lectin receptor signaling pathway	KEGG PATHWAY	13/410	145/13589	0.000445594	0.00976594	Organismal Systems	Immune system
10	map05160	Hepatitis C	KEGG PATHWAY	10/410	93/13589	0.000485311	0.00981822	Human Diseases	Infectious diseases: Viral
9	map04657	IL-17 signaling pathway	KEGG PATHWAY	9/410	79/13589	0.000603354	0.0113344	Organismal Systems	Immune system
15	map04013	MAPK signaling pathway - fly	KEGG PATHWAY	15/410	196/13589	0.000896138	0.0157123	Environmental Information Processing	Signal transduction
15	map05164	Influenza A	KEGG PATHWAY	15/410	196/13589	0.000896138	0.0157123	Human Diseases	Infectious diseases: Viral
12	map05145	Toxoplasmosis	KEGG PATHWAY	12/410	140/13589	0.00108858	0.0168409	Human Diseases	Infectious diseases: Parasitic
9	map04920	Adipocytokine signaling pathway	KEGG PATHWAY	9/410	87/13589	0.00121722	0.0177849	Organismal Systems	Endocrine system
9	map04630	Jak-STAT signaling pathway	KEGG PATHWAY	9/410	87/13589	0.00121722	0.0177849	Environmental Information Processing	Signal transduction
11	map05120	Epithelial cell signaling in Helicobacter pylori infection	KEGG PATHWAY	11/410	125/13589	0.00140299	0.0184494	Human Diseases	Infectious diseases: Bacterial
7	map04658	Th1 and Th2 cell differentiation	KEGG PATHWAY	7/410	57/13589	0.00155623	0.0194899	Organismal Systems	Immune system
9	map04668	TNF signaling pathway	KEGG PATHWAY	9/410	92/13589	0.00180708	0.0216028	Environmental Information Processing	Signal transduction
12	map04926	Relaxin signaling pathway	KEGG PATHWAY	12/410	150/13589	0.00196814	0.0225052	Organismal Systems	Endocrine system
6	map00220	Arginine biosynthesis	KEGG PATHWAY	6/410	46/13589	0.00245279	0.0268784	Metabolism	Amino acid metabolism
10	map04070	Phosphatidylinositol signaling system	KEGG PATHWAY	10/410	116/13589	0.00265806	0.0279628	Environmental Information Processing	Signal transduction
8	map04659	Th17 cell differentiation	KEGG PATHWAY	8/410	82/13589	0.00325673	0.0329431	Organismal Systems	Immune system
11	map05134	Legionellosis	KEGG PATHWAY	11/410	143/13589	0.0040411	0.0393633	Human Diseases	Infectious diseases: Bacterial
5	map01523	Antifolate resistance	KEGG PATHWAY	5/410	36/13589	0.00425503	0.0399669	Human Diseases	Drug resistance: Antineoplastic
28	map05200	Pathways in cancer	KEGG PATHWAY	28/410	546/13589	0.00441715	0.0400589	Human Diseases	Cancers: Overview
4	map00790	Folate biosynthesis	KEGG PATHWAY	4/410	23/13589	0.00458685	0.0402114	Metabolism	Metabolism of cofactors and vitamins
8	map04350	TGF-beta signaling pathway	KEGG PATHWAY	8/410	89/13589	0.00538111	0.0456527	Environmental Information Processing	Signal transduction
13	map05152	Tuberculosis	KEGG PATHWAY	13/410	193/13589	0.00578123	0.0475145	Human Diseases	Infectious diseases: Bacterial
7	map04662	B cell receptor signaling pathway	KEGG PATHWAY	7/410	73/13589	0.00636146	0.0506989	Organismal Systems	Immune system
20	map04010	MAPK signaling pathway	KEGG PATHWAY	20/410	365/13589	0.00757244	0.0585751	Environmental Information Processing	Signal transduction
14	map05418	Fluid shear stress and atherosclerosis	KEGG PATHWAY	14/410	225/13589	0.00843857	0.0634099	Human Diseases	Cardiovascular diseases
12	map05132	Salmonella infection	KEGG PATHWAY	12/410	181/13589	0.00885389	0.0646826	Human Diseases	Infectious diseases: Bacterial
11	map05168	Herpes simplex infection	KEGG PATHWAY	11/410	161/13589	0.00965736	0.0686456	Human Diseases	Infectious diseases: Viral
12	map05202	Transcriptional misregulation in cancer	KEGG PATHWAY	12/410	186/13589	0.0108577	0.0751466	Human Diseases	Cancers: Overview
11	map05167	Kaposi sarcoma-associated herpesvirus infection	KEGG PATHWAY	11/410	166/13589	0.0119717	0.0807323	Human Diseases	Infectious diseases: Viral
7	map00250	Alanine, aspartate and glutamate metabolism	KEGG PATHWAY	7/410	83/13589	0.0125639	0.0826078	Metabolism	Amino acid metabolism
10	map04066	HIF-1 signaling pathway	KEGG PATHWAY	10/410	146/13589	0.0130698	0.0838378	Environmental Information Processing	Signal transduction
6	map04730	Long-term depression	KEGG PATHWAY	6/410	66/13589	0.0144003	0.090173	Organismal Systems	Nervous system
8	map04933	AGE-RAGE signaling pathway in diabetic complications	KEGG PATHWAY	8/410	107/13589	0.0156056	0.0932792	Human Diseases	Endocrine and metabolic diseases
9	map04071	Sphingolipid signaling pathway	KEGG PATHWAY	9/410	128/13589	0.0154592	0.0945526	Environmental Information Processing	Signal transduction
19	map05165	Human papillomavirus infection	KEGG PATHWAY	19/410	374/13589	0.0189468	0.101694	Human Diseases	Infectious diseases: Viral
14	map04014	Ras signaling pathway	KEGG PATHWAY	14/410	250/13589	0.0196653	0.103439	Environmental Information Processing	Signal transduction
7	map05031	Amphetamine addiction	KEGG PATHWAY	7/410	90/13589	0.0189314	0.103728	Human Diseases	Substance dependence
9	map05162	Measles	KEGG PATHWAY	9/410	132/13589	0.0185455	0.103776	Human Diseases	Infectious diseases: Viral
4	map04977	Vitamin digestion and absorption	KEGG PATHWAY	4/410	35/13589	0.0204375	0.105393	Organismal Systems	Digestive system
11	map04722	Neurotrophin signaling pathway	KEGG PATHWAY	11/410	177/13589	0.0185297	0.105941	Organismal Systems	Nervous system
15	map04024	cAMP signaling pathway	KEGG PATHWAY	15/410	272/13589	0.0182489	0.106655	Environmental Information Processing	Signal transduction
5	map04330	Notch signaling pathway	KEGG PATHWAY	5/410	53/13589	0.0213854	0.108161	Environmental Information Processing	Signal transduction
4	map04623	Cytosolic DNA-sensing pathway	KEGG PATHWAY	4/410	36/13589	0.0224603	0.111454	Organismal Systems	Immune system
10	map05161	Hepatitis B	KEGG PATHWAY	10/410	161/13589	0.0241835	0.117783	Human Diseases	Infectious diseases: Viral
6	map00562	Inositol phosphate metabolism	KEGG PATHWAY	6/410	76/13589	0.027026	0.129233	Metabolism	Carbohydrate metabolism
6	map04917	Prolactin signaling pathway	KEGG PATHWAY	6/410	76/13589	0.027026	0.129233	Organismal Systems	Endocrine system
11	map05169	Epstein-Barr virus infection	KEGG PATHWAY	11/410	190/13589	0.0293479	0.135412	Human Diseases	Infectious diseases: Viral
8	map04912	GnRH signaling pathway	KEGG PATHWAY	8/410	122/13589	0.0313982	0.142374	Organismal Systems	Endocrine system
7	map04380	Osteoclast differentiation	KEGG PATHWAY	7/410	101/13589	0.0330221	0.144747	Organismal Systems	Development
3	map05144	Malaria	KEGG PATHWAY	3/410	24/13589	0.0345032	0.14636	Human Diseases	Infectious diseases: Parasitic
9	map04621	NOD-like receptor signaling pathway	KEGG PATHWAY	9/410	146/13589	0.0328762	0.14655	Organismal Systems	Immune system
13	map04360	Axon guidance	KEGG PATHWAY	13/410	244/13589	0.0341057	0.147046	Organismal Systems	Development
8	map05224	Breast cancer	KEGG PATHWAY	8/410	125/13589	0.03553	0.148324	Human Diseases	Cancers: Specific types
8	map05222	Small cell lung cancer	KEGG PATHWAY	8/410	128/13589	0.0400147	0.161905	Human Diseases	Cancers: Specific types
4	map04622	RIG-I-like receptor signaling pathway	KEGG PATHWAY	4/410	43/13589	0.0399765	0.164278	Organismal Systems	Immune system
10	map04020	Calcium signaling pathway	KEGG PATHWAY	10/410	178/13589	0.0435996	0.171145	Environmental Information Processing	Signal transduction
5	map04930	Type II diabetes mellitus	KEGG PATHWAY	5/410	64/13589	0.0435814	0.173665	Human Diseases	Endocrine and metabolic diseases
5	map05221	Acute myeloid leukemia	KEGG PATHWAY	5/410	70/13589	0.0599325	0.228439	Human Diseases	Cancers: Specific types
7	map05131	Shigellosis	KEGG PATHWAY	7/410	115/13589	0.0592591	0.229193	Human Diseases	Infectious diseases: Bacterial
12	map05163	Human cytomegalovirus infection	KEGG PATHWAY	12/410	250/13589	0.0767196	0.28024	Human Diseases	Infectious diseases: Viral
3	map04060	Cytokine-cytokine receptor interaction	KEGG PATHWAY	3/410	33/13589	0.0764247	0.283094	Environmental Information Processing	Signaling molecules and interaction
5	map05212	Pancreatic cancer	KEGG PATHWAY	5/410	75/13589	0.0758839	0.285107	Human Diseases	Cancers: Specific types
6	map03008	Ribosome biogenesis in eukaryotes	KEGG PATHWAY	6/410	100/13589	0.0818017	0.290727	Genetic Information Processing	Translation
10	map04218	Cellular senescence	KEGG PATHWAY	10/410	201/13589	0.0836892	0.29347	Cellular Processes	Cell growth and death
10	map04062	Chemokine signaling pathway	KEGG PATHWAY	10/410	200/13589	0.0815923	0.293956	Organismal Systems	Immune system
8	map04931	Insulin resistance	KEGG PATHWAY	8/410	152/13589	0.0894741	0.309627	Human Diseases	Endocrine and metabolic diseases
4	map05323	Rheumatoid arthritis	KEGG PATHWAY	4/410	57/13589	0.0927509	0.312737	Human Diseases	Immune diseases
7	map05215	Prostate cancer	KEGG PATHWAY	7/410	128/13589	0.0926234	0.316363	Human Diseases	Cancers: Specific types
7	map04214	Apoptosis - fly	KEGG PATHWAY	7/410	130/13589	0.0985307	0.32802	Cellular Processes	Cell growth and death
2	map05143	African trypanosomiasis	KEGG PATHWAY	2/410	18/13589	0.101169	0.332594	Human Diseases	Infectious diseases: Parasitic
14	map04510	Focal adhesion	KEGG PATHWAY	14/410	321/13589	0.107701	0.345432	Cellular Processes	Cellular community - eukaryotes
4	map04320	Dorso-ventral axis formation	KEGG PATHWAY	4/410	60/13589	0.106954	0.347271	Organismal Systems	Development
7	map04660	T cell receptor signaling pathway	KEGG PATHWAY	7/410	134/13589	0.11095	0.351565	Organismal Systems	Immune system
4	map00380	Tryptophan metabolism	KEGG PATHWAY	4/410	62/13589	0.116936	0.357606	Metabolism	Amino acid metabolism
3	map02010	ABC transporters	KEGG PATHWAY	3/410	40/13589	0.119051	0.359889	Environmental Information Processing	Membrane transport
8	map04072	Phospholipase D signaling pathway	KEGG PATHWAY	8/410	163/13589	0.120423	0.359901	Environmental Information Processing	Signal transduction
10	map05206	MicroRNAs in cancer	KEGG PATHWAY	10/410	215/13589	0.116468	0.360366	Human Diseases	Cancers: Overview
1	map00524	Neomycin, kanamycin and gentamicin biosynthesis	KEGG PATHWAY	1/410	4/13589	0.115345	0.36114	Metabolism	Biosynthesis of other secondary metabolites
5	map05230	Central carbon metabolism in cancer	KEGG PATHWAY	5/410	88/13589	0.126806	0.374718	Human Diseases	Cancers: Overview
4	map04740	Olfactory transduction	KEGG PATHWAY	4/410	65/13589	0.132632	0.375077	Organismal Systems	Sensory system
5	map04726	Serotonergic synapse	KEGG PATHWAY	5/410	89/13589	0.131249	0.375202	Organismal Systems	Nervous system
2	map00515	Mannose type O-glycan biosynthesis	KEGG PATHWAY	2/410	21/13589	0.131038	0.378715	Metabolism	Glycan biosynthesis and metabolism
14	map04144	Endocytosis	KEGG PATHWAY	14/410	332/13589	0.130683	0.381884	Cellular Processes	Transport and catabolism
7	map04728	Dopaminergic synapse	KEGG PATHWAY	7/410	142/13589	0.13813	0.386471	Organismal Systems	Nervous system
5	map05412	Arrhythmogenic right ventricular cardiomyopathy (ARVC)	KEGG PATHWAY	5/410	92/13589	0.144992	0.389112	Human Diseases	Cardiovascular diseases
1	map00601	Glycosphingolipid biosynthesis - lacto and neolacto series	KEGG PATHWAY	1/410	5/13589	0.142044	0.389142	Metabolism	Glycan biosynthesis and metabolism
4	map04340	Hedgehog signaling pathway	KEGG PATHWAY	4/410	67/13589	0.14355	0.389213	Environmental Information Processing	Signal transduction
3	map00900	Terpenoid backbone biosynthesis	KEGG PATHWAY	3/410	44/13589	0.14656	0.389347	Metabolism	Metabolism of terpenoids and polyketides
2	map00650	Butanoate metabolism	KEGG PATHWAY	2/410	22/13589	0.141398	0.39145	Metabolism	Carbohydrate metabolism
14	map05205	Proteoglycans in cancer	KEGG PATHWAY	14/410	340/13589	0.149012	0.391903	Human Diseases	Cancers: Overview
10	map04910	Insulin signaling pathway	KEGG PATHWAY	10/410	228/13589	0.152473	0.397033	Organismal Systems	Endocrine system
11	map04530	Tight junction	KEGG PATHWAY	11/410	258/13589	0.158062	0.407553	Cellular Processes	Cellular community - eukaryotes
8	map04310	Wnt signaling pathway	KEGG PATHWAY	8/410	175/13589	0.159817	0.408077	Environmental Information Processing	Signal transduction
2	map04744	Phototransduction	KEGG PATHWAY	2/410	24/13589	0.1626	0.411192	Organismal Systems	Sensory system
6	map05410	Hypertrophic cardiomyopathy (HCM)	KEGG PATHWAY	6/410	124/13589	0.172164	0.431229	Human Diseases	Cardiovascular diseases
8	map04391	Hippo signaling pathway - fly	KEGG PATHWAY	8/410	179/13589	0.174153	0.432096	Environmental Information Processing	Signal transduction
13	map04151	PI3K-Akt signaling pathway	KEGG PATHWAY	13/410	324/13589	0.182081	0.447546	Environmental Information Processing	Signal transduction
2	map04975	Fat digestion and absorption	KEGG PATHWAY	2/410	26/13589	0.18432	0.448853	Organismal Systems	Digestive system
2	map00360	Phenylalanine metabolism	KEGG PATHWAY	2/410	26/13589	0.18432	0.448853	Metabolism	Amino acid metabolism
8	map04150	mTOR signaling pathway	KEGG PATHWAY	8/410	184/13589	0.192845	0.452841	Environmental Information Processing	Signal transduction
5	map05416	Viral myocarditis	KEGG PATHWAY	5/410	101/13589	0.189596	0.453306	Human Diseases	Cardiovascular diseases
5	map01522	Endocrine resistance	KEGG PATHWAY	5/410	101/13589	0.189596	0.453306	Human Diseases	Drug resistance: Antineoplastic
4	map04976	Bile secretion	KEGG PATHWAY	4/410	76/13589	0.196581	0.45753	Organismal Systems	Digestive system
3	map04979	Cholesterol metabolism	KEGG PATHWAY	3/410	52/13589	0.20668	0.472669	Organismal Systems	Digestive system
4	map05214	Glioma	KEGG PATHWAY	4/410	78/13589	0.209103	0.474087	Human Diseases	Cancers: Specific types
9	map04390	Hippo signaling pathway	KEGG PATHWAY	9/410	216/13589	0.206256	0.475837	Environmental Information Processing	Signal transduction
6	map04211	Longevity regulating pathway	KEGG PATHWAY	6/410	134/13589	0.218494	0.486983	Organismal Systems	Aging
1	map00072	Synthesis and degradation of ketone bodies	KEGG PATHWAY	1/410	8/13589	0.217414	0.488718	Metabolism	Lipid metabolism
3	map00280	Valine, leucine and isoleucine degradation	KEGG PATHWAY	3/410	55/13589	0.230506	0.501017	Metabolism	Amino acid metabolism
8	map04210	Apoptosis	KEGG PATHWAY	8/410	194/13589	0.232544	0.501304	Cellular Processes	Cell growth and death
2	map00350	Tyrosine metabolism	KEGG PATHWAY	2/410	30/13589	0.228781	0.501412	Metabolism	Amino acid metabolism
4	map00620	Pyruvate metabolism	KEGG PATHWAY	4/410	82/13589	0.234785	0.50202	Metabolism	Carbohydrate metabolism
4	map04512	ECM-receptor interaction	KEGG PATHWAY	4/410	81/13589	0.228292	0.504544	Environmental Information Processing	Signaling molecules and interaction
1	map00430	Taurine and hypotaurine metabolism	KEGG PATHWAY	1/410	9/13589	0.24104	0.507148	Metabolism	Metabolism of other amino acids
11	map05166	Human T-cell leukemia virus 1 infection	KEGG PATHWAY	11/410	284/13589	0.240041	0.509118	Human Diseases	Infectious diseases: Viral
5	map04970	Salivary secretion	KEGG PATHWAY	5/410	113/13589	0.255359	0.53301	Organismal Systems	Digestive system
6	map05211	Renal cell carcinoma	KEGG PATHWAY	6/410	142/13589	0.258233	0.534767	Human Diseases	Cancers: Specific types
4	map05032	Morphine addiction	KEGG PATHWAY	4/410	86/13589	0.261171	0.536624	Human Diseases	Substance dependence
11	map04810	Regulation of actin cytoskeleton	KEGG PATHWAY	11/410	292/13589	0.268042	0.53813	Cellular Processes	Cell motility
3	map00970	Aminoacyl-tRNA biosynthesis	KEGG PATHWAY	3/410	60/13589	0.271194	0.540334	Genetic Information Processing	Translation
4	map04745	Phototransduction - fly	KEGG PATHWAY	4/410	87/13589	0.267857	0.541895	Organismal Systems	Sensory system
8	map04915	Estrogen signaling pathway	KEGG PATHWAY	8/410	204/13589	0.274818	0.543438	Organismal Systems	Endocrine system
5	map05414	Dilated cardiomyopathy (DCM)	KEGG PATHWAY	5/410	115/13589	0.26684	0.544022	Human Diseases	Cardiovascular diseases
9	map04921	Oxytocin signaling pathway	KEGG PATHWAY	9/410	237/13589	0.287946	0.552772	Organismal Systems	Endocrine system
1	map00603	Glycosphingolipid biosynthesis - globo and isoglobo series	KEGG PATHWAY	1/410	11/13589	0.286178	0.553418	Metabolism	Glycan biosynthesis and metabolism
7	map04934	Cushing syndrome	KEGG PATHWAY	7/410	176/13589	0.282044	0.553565	Human Diseases	Endocrine and metabolic diseases
2	map04610	Complement and coagulation cascades	KEGG PATHWAY	2/410	35/13589	0.285135	0.555485	Organismal Systems	Immune system
4	map05220	Chronic myeloid leukemia	KEGG PATHWAY	4/410	92/13589	0.301694	0.570832	Human Diseases	Cancers: Specific types
3	map04370	VEGF signaling pathway	KEGG PATHWAY	3/410	64/13589	0.304273	0.571598	Environmental Information Processing	Signal transduction
9	map04145	Phagosome	KEGG PATHWAY	9/410	240/13589	0.300299	0.572309	Cellular Processes	Transport and catabolism
10	map05203	Viral carcinogenesis	KEGG PATHWAY	10/410	274/13589	0.314536	0.582555	Human Diseases	Cancers: Overview
5	map04713	Circadian entrainment	KEGG PATHWAY	5/410	123/13589	0.313758	0.585237	Organismal Systems	Environmental adaptation
4	map00480	Glutathione metabolism	KEGG PATHWAY	4/410	95/13589	0.322231	0.592634	Metabolism	Metabolism of other amino acids
4	map00520	Amino sugar and nucleotide sugar metabolism	KEGG PATHWAY	4/410	96/13589	0.329101	0.592832	Metabolism	Carbohydrate metabolism
5	map04916	Melanogenesis	KEGG PATHWAY	5/410	125/13589	0.325671	0.594801	Organismal Systems	Endocrine system
1	map00981	Insect hormone biosynthesis	KEGG PATHWAY	1/410	13/13589	0.328638	0.596081	Metabolism	Metabolism of terpenoids and polyketides
4	map04924	Renin secretion	KEGG PATHWAY	4/410	99/13589	0.34975	0.625744	Organismal Systems	Endocrine system
4	map00564	Glycerophospholipid metabolism	KEGG PATHWAY	4/410	99/13589	0.34975	0.625744	Metabolism	Lipid metabolism
1	map00061	Fatty acid biosynthesis	KEGG PATHWAY	1/410	15/13589	0.368578	0.64624	Metabolism	Lipid metabolism
5	map04670	Leukocyte transendothelial migration	KEGG PATHWAY	5/410	132/13589	0.367655	0.648948	Organismal Systems	Immune system
3	map04721	Synaptic vesicle cycle	KEGG PATHWAY	3/410	74/13589	0.387129	0.65687	Organismal Systems	Nervous system
3	map04080	Neuroactive ligand-receptor interaction	KEGG PATHWAY	3/410	73/13589	0.378906	0.659949	Environmental Information Processing	Signaling molecules and interaction
2	map00410	beta-Alanine metabolism	KEGG PATHWAY	2/410	44/13589	0.384833	0.665863	Metabolism	Metabolism of other amino acids
2	map04742	Taste transduction	KEGG PATHWAY	2/410	44/13589	0.384833	0.665863	Organismal Systems	Sensory system
2	map00071	Fatty acid degradation	KEGG PATHWAY	2/410	44/13589	0.384833	0.665863	Metabolism	Lipid metabolism
2	map04341	Hedgehog signaling pathway - fly	KEGG PATHWAY	2/410	46/13589	0.406244	0.671963	Environmental Information Processing	Signal transduction
4	map03015	mRNA surveillance pathway	KEGG PATHWAY	4/410	108/13589	0.411554	0.676493	Genetic Information Processing	Translation
3	map05014	Amyotrophic lateral sclerosis (ALS)	KEGG PATHWAY	3/410	76/13589	0.403493	0.680247	Human Diseases	Neurodegenerative diseases
1	map04950	Maturity onset diabetes of the young	KEGG PATHWAY	1/410	17/13589	0.406147	0.680361	Human Diseases	Endocrine and metabolic diseases
1	map00514	Other types of O-glycan biosynthesis	KEGG PATHWAY	1/410	17/13589	0.406147	0.680361	Metabolism	Glycan biosynthesis and metabolism
6	map04919	Thyroid hormone signaling pathway	KEGG PATHWAY	6/410	172/13589	0.417927	0.6827	Organismal Systems	Endocrine system
5	map05100	Bacterial invasion of epithelial cells	KEGG PATHWAY	5/410	141/13589	0.421667	0.684558	Human Diseases	Infectious diseases: Bacterial
6	map04152	AMPK signaling pathway	KEGG PATHWAY	6/410	177/13589	0.444793	0.696313	Environmental Information Processing	Signal transduction
8	map04932	Non-alcoholic fatty liver disease (NAFLD)	KEGG PATHWAY	8/410	241/13589	0.442577	0.696992	Human Diseases	Endocrine and metabolic diseases
4	map05210	Colorectal cancer	KEGG PATHWAY	4/410	112/13589	0.438679	0.699228	Human Diseases	Cancers: Specific types
1	map00920	Sulfur metabolism	KEGG PATHWAY	1/410	19/13589	0.441486	0.699463	Metabolism	Energy metabolism
6	map04922	Glucagon signaling pathway	KEGG PATHWAY	6/410	175/13589	0.434071	0.700373	Organismal Systems	Endocrine system
2	map00600	Sphingolipid metabolism	KEGG PATHWAY	2/410	49/13589	0.437664	0.701864	Metabolism	Lipid metabolism
2	map05218	Melanoma	KEGG PATHWAY	2/410	51/13589	0.458102	0.708711	Human Diseases	Cancers: Specific types
5	map04012	ErbB signaling pathway	KEGG PATHWAY	5/410	147/13589	0.457252	0.711581	Environmental Information Processing	Signal transduction
2	map04961	Endocrine and other factor-regulated calcium reabsorption	KEGG PATHWAY	2/410	52/13589	0.468159	0.715848	Organismal Systems	Excretory system
2	map05217	Basal cell carcinoma	KEGG PATHWAY	2/410	52/13589	0.468159	0.715848	Human Diseases	Cancers: Specific types
3	map00330	Arginine and proline metabolism	KEGG PATHWAY	3/410	85/13589	0.475259	0.718351	Metabolism	Amino acid metabolism
2	map05020	Prion diseases	KEGG PATHWAY	2/410	53/13589	0.478104	0.718523	Human Diseases	Neurodegenerative diseases
3	map04971	Gastric acid secretion	KEGG PATHWAY	3/410	84/13589	0.467468	0.718972	Organismal Systems	Digestive system
3	map04392	Hippo signaling pathway - multiple species	KEGG PATHWAY	3/410	87/13589	0.490681	0.733233	Environmental Information Processing	Signal transduction
5	map05034	Alcoholism	KEGG PATHWAY	5/410	154/13589	0.497951	0.735737	Human Diseases	Substance dependence
6	map04142	Lysosome	KEGG PATHWAY	6/410	189/13589	0.508026	0.738182	Cellular Processes	Transport and catabolism
8	map04015	Rap1 signaling pathway	KEGG PATHWAY	8/410	253/13589	0.497047	0.738551	Environmental Information Processing	Signal transduction
5	map04261	Adrenergic signaling in cardiomyocytes	KEGG PATHWAY	5/410	155/13589	0.503675	0.740036	Organismal Systems	Circulatory system
2	map00910	Nitrogen metabolism	KEGG PATHWAY	2/410	56/13589	0.507245	0.741142	Metabolism	Energy metabolism
2	map04978	Mineral absorption	KEGG PATHWAY	2/410	58/13589	0.526075	0.760208	Organismal Systems	Digestive system
4	map04146	Peroxisome	KEGG PATHWAY	4/410	129/13589	0.548755	0.788648	Cellular Processes	Transport and catabolism
4	map04212	Longevity regulating pathway - worm	KEGG PATHWAY	4/410	132/13589	0.567013	0.801745	Organismal Systems	Aging
1	map00340	Histidine metabolism	KEGG PATHWAY	1/410	27/13589	0.563067	0.804819	Metabolism	Amino acid metabolism
1	map04966	Collecting duct acid secretion	KEGG PATHWAY	1/410	27/13589	0.563067	0.804819	Organismal Systems	Excretory system
2	map00500	Starch and sucrose metabolism	KEGG PATHWAY	2/410	64/13589	0.579587	0.815141	Metabolism	Carbohydrate metabolism
4	map04925	Aldosterone synthesis and secretion	KEGG PATHWAY	4/410	135/13589	0.584858	0.818179	Organismal Systems	Endocrine system
5	map04114	Oocyte meiosis	KEGG PATHWAY	5/410	171/13589	0.591252	0.818418	Cellular Processes	Cell growth and death
1	map04940	Type I diabetes mellitus	KEGG PATHWAY	1/410	29/13589	0.589087	0.819735	Human Diseases	Endocrine and metabolic diseases
4	map04612	Antigen processing and presentation	KEGG PATHWAY	4/410	137/13589	0.596516	0.82138	Organismal Systems	Immune system
2	map04923	Regulation of lipolysis in adipocytes	KEGG PATHWAY	2/410	69/13589	0.620697	0.850225	Organismal Systems	Endocrine system
8	map04141	Protein processing in endoplasmic reticulum	KEGG PATHWAY	8/410	283/13589	0.62448	0.850975	Genetic Information Processing	Folding, sorting and degradation
1	map00590	Arachidonic acid metabolism	KEGG PATHWAY	1/410	34/13589	0.647572	0.860159	Metabolism	Lipid metabolism
2	map00561	Glycerolipid metabolism	KEGG PATHWAY	2/410	73/13589	0.651303	0.860767	Metabolism	Lipid metabolism
1	map00053	Ascorbate and aldarate metabolism	KEGG PATHWAY	1/410	35/13589	0.658232	0.861269	Metabolism	Carbohydrate metabolism
3	map05110	Vibrio cholerae infection	KEGG PATHWAY	3/410	111/13589	0.655475	0.86195	Human Diseases	Infectious diseases: Bacterial
1	map04913	Ovarian steroidogenesis	KEGG PATHWAY	1/410	33/13589	0.636581	0.862994	Organismal Systems	Endocrine system
4	map00240	Pyrimidine metabolism	KEGG PATHWAY	4/410	146/13589	0.646488	0.867481	Metabolism	Nucleotide metabolism
4	map04270	Vascular smooth muscle contraction	KEGG PATHWAY	4/410	146/13589	0.646488	0.867481	Organismal Systems	Circulatory system
2	map04514	Cell adhesion molecules (CAMs)	KEGG PATHWAY	2/410	72/13589	0.64384	0.868359	Environmental Information Processing	Signaling molecules and interaction
1	map00450	Selenocompound metabolism	KEGG PATHWAY	1/410	36/13589	0.668571	0.870466	Metabolism	Metabolism of other amino acids
1	map00565	Ether lipid metabolism	KEGG PATHWAY	1/410	37/13589	0.678597	0.879167	Metabolism	Lipid metabolism
1	map00640	Propanoate metabolism	KEGG PATHWAY	1/410	37/13589	0.678597	0.879167	Metabolism	Carbohydrate metabolism
5	map04140	Autophagy - animal	KEGG PATHWAY	5/410	191/13589	0.687627	0.882176	Cellular Processes	Transport and catabolism
1	map03020	RNA polymerase	KEGG PATHWAY	1/410	39/13589	0.697751	0.890818	Genetic Information Processing	Transcription
3	map04724	Glutamatergic synapse	KEGG PATHWAY	3/410	121/13589	0.711777	0.904335	Organismal Systems	Nervous system
1	map04130	SNARE interactions in vesicular transport	KEGG PATHWAY	1/410	41/13589	0.715766	0.905031	Genetic Information Processing	Folding, sorting and degradation
5	map05225	Hepatocellular carcinoma	KEGG PATHWAY	5/410	205/13589	0.745238	0.907397	Human Diseases	Cancers: Specific types
8	map05010	Alzheimer disease	KEGG PATHWAY	8/410	315/13589	0.738762	0.907918	Human Diseases	Neurodegenerative diseases
2	map01521	EGFR tyrosine kinase inhibitor resistance	KEGG PATHWAY	2/410	87/13589	0.743092	0.908992	Human Diseases	Drug resistance: Antineoplastic
2	map04727	GABAergic synapse	KEGG PATHWAY	2/410	86/13589	0.73729	0.910362	Organismal Systems	Nervous system
1	map05216	Thyroid cancer	KEGG PATHWAY	1/410	42/13589	0.724367	0.911525	Human Diseases	Cancers: Specific types
1	map04960	Aldosterone-regulated sodium reabsorption	KEGG PATHWAY	1/410	43/13589	0.732709	0.913282	Organismal Systems	Excretory system
1	map05219	Bladder cancer	KEGG PATHWAY	1/410	43/13589	0.732709	0.913282	Human Diseases	Cancers: Specific types
5	map04022	cGMP-PKG signaling pathway	KEGG PATHWAY	5/410	208/13589	0.756506	0.916872	Environmental Information Processing	Signal transduction
1	map04973	Carbohydrate digestion and absorption	KEGG PATHWAY	1/410	50/13589	0.78446	0.916947	Organismal Systems	Digestive system
3	map04540	Gap junction	KEGG PATHWAY	3/410	125/13589	0.732223	0.917022	Cellular Processes	Cellular community - eukaryotes
1	map00510	N-Glycan biosynthesis	KEGG PATHWAY	1/410	48/13589	0.77079	0.917275	Metabolism	Glycan biosynthesis and metabolism
3	map05130	Pathogenic Escherichia coli infection	KEGG PATHWAY	3/410	135/13589	0.77834	0.917952	Human Diseases	Infectious diseases: Bacterial
4	map04120	Ubiquitin mediated proteolysis	KEGG PATHWAY	4/410	176/13589	0.782044	0.918203	Genetic Information Processing	Folding, sorting and degradation
2	map04750	Inflammatory mediator regulation of TRP channels	KEGG PATHWAY	2/410	96/13589	0.790533	0.919956	Organismal Systems	Sensory system
1	map04710	Circadian rhythm	KEGG PATHWAY	1/410	49/13589	0.77773	0.921365	Organismal Systems	Environmental adaptation
2	map00030	Pentose phosphate pathway	KEGG PATHWAY	2/410	97/13589	0.795298	0.921425	Metabolism	Carbohydrate metabolism
14	map00310	Lysine degradation	KEGG PATHWAY	14/410	559/13589	0.799667	0.922423	Metabolism	Amino acid metabolism
3	map05226	Gastric cancer	KEGG PATHWAY	3/410	144/13589	0.814077	0.922855	Human Diseases	Cancers: Specific types
3	map04666	Fc gamma R-mediated phagocytosis	KEGG PATHWAY	3/410	144/13589	0.814077	0.922855	Organismal Systems	Immune system
3	map04213	Longevity regulating pathway - multiple species	KEGG PATHWAY	3/410	146/13589	0.821323	0.923111	Organismal Systems	Aging
5	map00230	Purine metabolism	KEGG PATHWAY	5/410	222/13589	0.804183	0.923581	Metabolism	Nucleotide metabolism
1	map00052	Galactose metabolism	KEGG PATHWAY	1/410	54/13589	0.80941	0.925542	Metabolism	Carbohydrate metabolism
2	map04720	Long-term potentiation	KEGG PATHWAY	2/410	101/13589	0.813414	0.926095	Organismal Systems	Nervous system
2	map00983	Drug metabolism - other enzymes	KEGG PATHWAY	2/410	92/13589	0.770483	0.929528	Metabolism	Xenobiotics biodegradation and metabolism
2	map00051	Fructose and mannose metabolism	KEGG PATHWAY	2/410	92/13589	0.770483	0.929528	Metabolism	Carbohydrate metabolism
2	map03320	PPAR signaling pathway	KEGG PATHWAY	2/410	92/13589	0.770483	0.929528	Organismal Systems	Endocrine system
5	map03013	RNA transport	KEGG PATHWAY	5/410	241/13589	0.856727	0.93883	Genetic Information Processing	Translation
1	map00020	Citrate cycle (TCA cycle)	KEGG PATHWAY	1/410	60/13589	0.841535	0.941803	Metabolism	Carbohydrate metabolism
2	map04911	Insulin secretion	KEGG PATHWAY	2/410	112/13589	0.856062	0.942027	Organismal Systems	Endocrine system
2	map04550	Signaling pathways regulating pluripotency of stem cells	KEGG PATHWAY	2/410	123/13589	0.889639	0.943448	Cellular Processes	Cellular community - eukaryotes
3	map04520	Adherens junction	KEGG PATHWAY	3/410	156/13589	0.85404	0.943751	Cellular Processes	Cellular community - eukaryotes
1	map04927	Cortisol synthesis and secretion	KEGG PATHWAY	1/410	71/13589	0.887056	0.944517	Organismal Systems	Endocrine system
3	map04611	Platelet activation	KEGG PATHWAY	3/410	167/13589	0.883881	0.944962	Organismal Systems	Immune system
2	map04914	Progesterone-mediated oocyte maturation	KEGG PATHWAY	2/410	125/13589	0.894904	0.94522	Organismal Systems	Endocrine system
2	map04725	Cholinergic synapse	KEGG PATHWAY	2/410	111/13589	0.852587	0.946119	Organismal Systems	Nervous system
1	map03460	Fanconi anemia pathway	KEGG PATHWAY	1/410	67/13589	0.872251	0.947942	Genetic Information Processing	Replication and repair
1	map04974	Protein digestion and absorption	KEGG PATHWAY	1/410	62/13589	0.850995	0.948354	Organismal Systems	Digestive system
1	map04962	Vasopressin-regulated water reabsorption	KEGG PATHWAY	1/410	69/13589	0.879881	0.948396	Organismal Systems	Excretory system
1	map05223	Non-small cell lung cancer	KEGG PATHWAY	1/410	70/13589	0.883524	0.948436	Human Diseases	Cancers: Specific types
3	map04217	Necroptosis	KEGG PATHWAY	3/410	164/13589	0.876332	0.948458	Cellular Processes	Cell growth and death
2	map04972	Pancreatic secretion	KEGG PATHWAY	2/410	116/13589	0.869228	0.948577	Organismal Systems	Digestive system
1	map05213	Endometrial cancer	KEGG PATHWAY	1/410	79/13589	0.911727	0.959137	Human Diseases	Cancers: Specific types
3	map03040	Spliceosome	KEGG PATHWAY	3/410	191/13589	0.930889	0.975394	Genetic Information Processing	Transcription
1	map04918	Thyroid hormone synthesis	KEGG PATHWAY	1/410	89/13589	0.935145	0.975965	Organismal Systems	Endocrine system
1	map04650	Natural killer cell mediated cytotoxicity	KEGG PATHWAY	1/410	96/13589	0.947741	0.985201	Organismal Systems	Immune system
3	map03010	Ribosome	KEGG PATHWAY	3/410	700/13589	1	1	Genetic Information Processing	Translation
1	map03018	RNA degradation	KEGG PATHWAY	1/410	113/13589	0.969083	1	Genetic Information Processing	Folding, sorting and degradation
2	map00010	Glycolysis / Gluconeogenesis	KEGG PATHWAY	2/410	193/13589	0.981619	1	Metabolism	Carbohydrate metabolism
1	map00270	Cysteine and methionine metabolism	KEGG PATHWAY	1/410	130/13589	0.981721	1	Metabolism	Amino acid metabolism
2	map04068	FoxO signaling pathway	KEGG PATHWAY	2/410	199/13589	0.984334	1	Environmental Information Processing	Signal transduction
6	map04714	Thermogenesis	KEGG PATHWAY	6/410	429/13589	0.990563	1	Organismal Systems	Environmental adaptation
1	map04723	Retrograde endocannabinoid signaling	KEGG PATHWAY	1/410	159/13589	0.992554	1	Organismal Systems	Nervous system
1	map04110	Cell cycle	KEGG PATHWAY	1/410	196/13589	0.997639	1	Cellular Processes	Cell growth and death
1	map05012	Parkinson disease	KEGG PATHWAY	1/410	276/13589	0.999805	1	Human Diseases	Neurodegenerative diseases
1	map00190	Oxidative phosphorylation	KEGG PATHWAY	1/410	283/13589	0.999844	1	Metabolism	Energy metabolism

## Sheet: Up-regulated_KEGG_pathways_24h
Num	Pathway id	Description	Database	Ratio_in_study	Ratio_in_pop	Pvalue_uncorrected	Pvalue_corrected	First Category	Second Category
21	map04013	MAPK signaling pathway - fly	KEGG PATHWAY	21/493	196/13589	9.02582e-06	0.000824358	Environmental Information Processing	Signal transduction
14	map03008	Ribosome biogenesis in eukaryotes	KEGG PATHWAY	14/493	100/13589	1.43656e-05	0.000984041	Genetic Information Processing	Translation
11	map05140	Leishmaniasis	KEGG PATHWAY	11/493	59/13589	7.40637e-06	0.00101467	Human Diseases	Infectious diseases: Parasitic
17	map05231	Choline metabolism in cancer	KEGG PATHWAY	17/493	131/13589	5.08336e-06	0.00139284	Human Diseases	Cancers: Overview
10	map05323	Rheumatoid arthritis	KEGG PATHWAY	10/493	57/13589	3.35862e-05	0.00184053	Human Diseases	Immune diseases
12	map05133	Pertussis	KEGG PATHWAY	12/493	88/13589	7.60551e-05	0.00347318	Human Diseases	Infectious diseases: Bacterial
14	map05146	Amoebiasis	KEGG PATHWAY	14/493	131/13589	0.000285444	0.0111731	Human Diseases	Infectious diseases: Parasitic
36	map05200	Pathways in cancer	KEGG PATHWAY	36/493	546/13589	0.000397103	0.0136008	Human Diseases	Cancers: Overview
10	map04624	Toll and Imd signaling pathway	KEGG PATHWAY	10/493	80/13589	0.00060817	0.0166639	Organismal Systems	Immune system
10	map04620	Toll-like receptor signaling pathway	KEGG PATHWAY	10/493	81/13589	0.00067181	0.0167342	Organismal Systems	Immune system
13	map05120	Epithelial cell signaling in Helicobacter pylori infection	KEGG PATHWAY	13/493	125/13589	0.000606205	0.0184556	Human Diseases	Infectious diseases: Bacterial
7	map00220	Arginine biosynthesis	KEGG PATHWAY	7/493	46/13589	0.00124318	0.0262025	Metabolism	Amino acid metabolism
10	map04630	Jak-STAT signaling pathway	KEGG PATHWAY	10/493	87/13589	0.00117942	0.0269301	Environmental Information Processing	Signal transduction
11	map05142	Chagas disease (American trypanosomiasis)	KEGG PATHWAY	11/493	107/13589	0.00171754	0.0336147	Human Diseases	Infectious diseases: Parasitic
5	map04966	Collecting duct acid secretion	KEGG PATHWAY	5/493	27/13589	0.00256489	0.0468519	Organismal Systems	Excretory system
14	map05167	Kaposi sarcoma-associated herpesvirus infection	KEGG PATHWAY	14/493	166/13589	0.00290687	0.0497802	Human Diseases	Infectious diseases: Viral
17	map05418	Fluid shear stress and atherosclerosis	KEGG PATHWAY	17/493	225/13589	0.00349744	0.0563705	Human Diseases	Cardiovascular diseases
9	map05230	Central carbon metabolism in cancer	KEGG PATHWAY	9/493	88/13589	0.0045567	0.0594541	Human Diseases	Cancers: Overview
15	map05152	Tuberculosis	KEGG PATHWAY	15/493	193/13589	0.00455153	0.062356	Human Diseases	Infectious diseases: Bacterial
7	map04320	Dorso-ventral axis formation	KEGG PATHWAY	7/493	60/13589	0.00580833	0.0636593	Organismal Systems	Development
4	map05321	Inflammatory bowel disease (IBD)	KEGG PATHWAY	4/493	20/13589	0.00521991	0.0650116	Human Diseases	Immune diseases
11	map05224	Breast cancer	KEGG PATHWAY	11/493	125/13589	0.00575246	0.0656739	Human Diseases	Cancers: Specific types
12	map05211	Renal cell carcinoma	KEGG PATHWAY	12/493	142/13589	0.0055445	0.0660519	Human Diseases	Cancers: Specific types
7	map05030	Cocaine addiction	KEGG PATHWAY	7/493	57/13589	0.0043629	0.066413	Human Diseases	Substance dependence
7	map04658	Th1 and Th2 cell differentiation	KEGG PATHWAY	7/493	57/13589	0.0043629	0.066413	Organismal Systems	Immune system
6	map04064	NF-kappa B signaling pathway	KEGG PATHWAY	6/493	47/13589	0.00672431	0.0708639	Environmental Information Processing	Signal transduction
17	map04014	Ras signaling pathway	KEGG PATHWAY	17/493	250/13589	0.00980191	0.0746034	Environmental Information Processing	Signal transduction
4	map05144	Malaria	KEGG PATHWAY	4/493	24/13589	0.0102118	0.0756222	Human Diseases	Infectious diseases: Parasitic
9	map00564	Glycerophospholipid metabolism	KEGG PATHWAY	9/493	99/13589	0.00975012	0.0763295	Metabolism	Lipid metabolism
7	map04930	Type II diabetes mellitus	KEGG PATHWAY	7/493	64/13589	0.00825765	0.0780206	Human Diseases	Endocrine and metabolic diseases
23	map05165	Human papillomavirus infection	KEGG PATHWAY	23/493	374/13589	0.00969835	0.0781573	Human Diseases	Infectious diseases: Viral
8	map04657	IL-17 signaling pathway	KEGG PATHWAY	8/493	79/13589	0.00775094	0.0786577	Organismal Systems	Immune system
5	map04977	Vitamin digestion and absorption	KEGG PATHWAY	5/493	35/13589	0.00813321	0.0795892	Organismal Systems	Digestive system
4	map00790	Folate biosynthesis	KEGG PATHWAY	4/493	23/13589	0.00875596	0.0799711	Metabolism	Metabolism of cofactors and vitamins
16	map04910	Insulin signaling pathway	KEGG PATHWAY	16/493	228/13589	0.00905576	0.0800412	Organismal Systems	Endocrine system
8	map04659	Th17 cell differentiation	KEGG PATHWAY	8/493	82/13589	0.00964204	0.0800582	Organismal Systems	Immune system
14	map05169	Epstein-Barr virus infection	KEGG PATHWAY	14/493	190/13589	0.00945909	0.0809935	Human Diseases	Infectious diseases: Viral
14	map05164	Influenza A	KEGG PATHWAY	14/493	196/13589	0.0122129	0.0880614	Human Diseases	Infectious diseases: Viral
13	map05132	Salmonella infection	KEGG PATHWAY	13/493	181/13589	0.0147766	0.0941577	Human Diseases	Infectious diseases: Bacterial
8	map04920	Adipocytokine signaling pathway	KEGG PATHWAY	8/493	87/13589	0.0135276	0.0950402	Organismal Systems	Endocrine system
22	map04010	MAPK signaling pathway	KEGG PATHWAY	22/493	365/13589	0.0139614	0.0956353	Environmental Information Processing	Signal transduction
12	map05161	Hepatitis B	KEGG PATHWAY	12/493	161/13589	0.0143666	0.0960106	Human Diseases	Infectious diseases: Viral
12	map05168	Herpes simplex infection	KEGG PATHWAY	12/493	161/13589	0.0143666	0.0960106	Human Diseases	Infectious diseases: Viral
13	map04150	mTOR signaling pathway	KEGG PATHWAY	13/493	184/13589	0.0167307	0.0975364	Environmental Information Processing	Signal transduction
11	map04625	C-type lectin receptor signaling pathway	KEGG PATHWAY	11/493	145/13589	0.0165392	0.0985161	Organismal Systems	Immune system
7	map04662	B cell receptor signaling pathway	KEGG PATHWAY	7/493	73/13589	0.0164257	0.100014	Organismal Systems	Immune system
8	map05031	Amphetamine addiction	KEGG PATHWAY	8/493	90/13589	0.0163475	0.1018	Human Diseases	Substance dependence
8	map04668	TNF signaling pathway	KEGG PATHWAY	8/493	92/13589	0.0184487	0.105311	Environmental Information Processing	Signal transduction
6	map00970	Aminoacyl-tRNA biosynthesis	KEGG PATHWAY	6/493	60/13589	0.0211797	0.118433	Genetic Information Processing	Translation
4	map00350	Tyrosine metabolism	KEGG PATHWAY	4/493	30/13589	0.0222137	0.121731	Metabolism	Amino acid metabolism
20	map05205	Proteoglycans in cancer	KEGG PATHWAY	20/493	340/13589	0.0233538	0.125469	Human Diseases	Cancers: Overview
15	map04145	Phagosome	KEGG PATHWAY	15/493	240/13589	0.028889	0.152223	Cellular Processes	Transport and catabolism
13	map04218	Cellular senescence	KEGG PATHWAY	13/493	201/13589	0.0317043	0.16087	Cellular Processes	Cell growth and death
10	map05145	Toxoplasmosis	KEGG PATHWAY	10/493	140/13589	0.0312857	0.161741	Human Diseases	Infectious diseases: Parasitic
9	map04912	GnRH signaling pathway	KEGG PATHWAY	9/493	122/13589	0.0334074	0.166429	Organismal Systems	Endocrine system
10	map04928	Parathyroid hormone synthesis, secretion and action	KEGG PATHWAY	10/493	142/13589	0.0340169	0.16644	Organismal Systems	Endocrine system
3	map00515	Mannose type O-glycan biosynthesis	KEGG PATHWAY	3/493	21/13589	0.0388455	0.186731	Metabolism	Glycan biosynthesis and metabolism
10	map04621	NOD-like receptor signaling pathway	KEGG PATHWAY	10/493	146/13589	0.0399706	0.188826	Organismal Systems	Immune system
8	map04933	AGE-RAGE signaling pathway in diabetic complications	KEGG PATHWAY	8/493	107/13589	0.0406602	0.188829	Human Diseases	Endocrine and metabolic diseases
9	map05222	Small cell lung cancer	KEGG PATHWAY	9/493	128/13589	0.0433275	0.194618	Human Diseases	Cancers: Specific types
7	map04350	TGF-beta signaling pathway	KEGG PATHWAY	7/493	89/13589	0.0426749	0.194882	Environmental Information Processing	Signal transduction
15	map04530	Tight junction	KEGG PATHWAY	15/493	258/13589	0.0493155	0.217943	Cellular Processes	Cellular community - eukaryotes
10	map04931	Insulin resistance	KEGG PATHWAY	10/493	152/13589	0.0501838	0.21826	Human Diseases	Endocrine and metabolic diseases
7	map05160	Hepatitis C	KEGG PATHWAY	7/493	93/13589	0.0519961	0.219184	Human Diseases	Infectious diseases: Viral
6	map04721	Synaptic vesicle cycle	KEGG PATHWAY	6/493	74/13589	0.0516306	0.221044	Organismal Systems	Nervous system
11	map04922	Glucagon signaling pathway	KEGG PATHWAY	11/493	175/13589	0.0541293	0.224719	Organismal Systems	Endocrine system
11	map04310	Wnt signaling pathway	KEGG PATHWAY	11/493	175/13589	0.0541293	0.224719	Environmental Information Processing	Signal transduction
11	map04722	Neurotrophin signaling pathway	KEGG PATHWAY	11/493	177/13589	0.0578089	0.226281	Organismal Systems	Nervous system
4	map04130	SNARE interactions in vesicular transport	KEGG PATHWAY	4/493	41/13589	0.0603114	0.229518	Genetic Information Processing	Folding, sorting and degradation
6	map05014	Amyotrophic lateral sclerosis (ALS)	KEGG PATHWAY	6/493	76/13589	0.0574302	0.23141	Human Diseases	Neurodegenerative diseases
6	map04917	Prolactin signaling pathway	KEGG PATHWAY	6/493	76/13589	0.0574302	0.23141	Organismal Systems	Endocrine system
8	map04070	Phosphatidylinositol signaling system	KEGG PATHWAY	8/493	116/13589	0.0601611	0.232171	Environmental Information Processing	Signal transduction
15	map04024	cAMP signaling pathway	KEGG PATHWAY	15/493	272/13589	0.0709829	0.266429	Environmental Information Processing	Signal transduction
9	map05134	Legionellosis	KEGG PATHWAY	9/493	143/13589	0.0762087	0.282178	Human Diseases	Infectious diseases: Bacterial
6	map00250	Alanine, aspartate and glutamate metabolism	KEGG PATHWAY	6/493	83/13589	0.0806838	0.294765	Metabolism	Amino acid metabolism
5	map04370	VEGF signaling pathway	KEGG PATHWAY	5/493	64/13589	0.08215	0.296172	Environmental Information Processing	Signal transduction
9	map04066	HIF-1 signaling pathway	KEGG PATHWAY	9/493	146/13589	0.0842311	0.299731	Environmental Information Processing	Signal transduction
5	map04730	Long-term depression	KEGG PATHWAY	5/493	66/13589	0.090945	0.319474	Organismal Systems	Nervous system
9	map04926	Relaxin signaling pathway	KEGG PATHWAY	9/493	150/13589	0.0956864	0.327726	Organismal Systems	Endocrine system
12	map04390	Hippo signaling pathway	KEGG PATHWAY	12/493	216/13589	0.0947954	0.328784	Environmental Information Processing	Signal transduction
8	map04214	Apoptosis - fly	KEGG PATHWAY	8/493	130/13589	0.100544	0.340113	Cellular Processes	Cell growth and death
7	map05110	Vibrio cholerae infection	KEGG PATHWAY	7/493	111/13589	0.10877	0.354797	Human Diseases	Infectious diseases: Bacterial
13	map04360	Axon guidance	KEGG PATHWAY	13/493	244/13589	0.107726	0.355625	Organismal Systems	Development
4	map04973	Carbohydrate digestion and absorption	KEGG PATHWAY	4/493	50/13589	0.107002	0.357543	Organismal Systems	Digestive system
10	map04020	Calcium signaling pathway	KEGG PATHWAY	10/493	178/13589	0.11361	0.361966	Environmental Information Processing	Signal transduction
7	map05210	Colorectal cancer	KEGG PATHWAY	7/493	112/13589	0.112629	0.363063	Human Diseases	Cancers: Specific types
6	map00983	Drug metabolism - other enzymes	KEGG PATHWAY	6/493	92/13589	0.1172	0.364919	Metabolism	Xenobiotics biodegradation and metabolism
4	map05217	Basal cell carcinoma	KEGG PATHWAY	4/493	52/13589	0.119093	0.366644	Human Diseases	Cancers: Specific types
3	map04060	Cytokine-cytokine receptor interaction	KEGG PATHWAY	3/493	33/13589	0.116418	0.36665	Environmental Information Processing	Signaling molecules and interaction
4	map04330	Notch signaling pathway	KEGG PATHWAY	4/493	53/13589	0.12535	0.377427	Environmental Information Processing	Signal transduction
14	map05203	Viral carcinogenesis	KEGG PATHWAY	14/493	274/13589	0.124926	0.380329	Human Diseases	Cancers: Overview
6	map00480	Glutathione metabolism	KEGG PATHWAY	6/493	95/13589	0.130941	0.389978	Metabolism	Metabolism of other amino acids
5	map00562	Inositol phosphate metabolism	KEGG PATHWAY	5/493	76/13589	0.141622	0.395964	Metabolism	Carbohydrate metabolism
5	map04976	Bile secretion	KEGG PATHWAY	5/493	76/13589	0.141622	0.395964	Organismal Systems	Digestive system
1	map00524	Neomycin, kanamycin and gentamicin biosynthesis	KEGG PATHWAY	1/493	4/13589	0.137424	0.400576	Metabolism	Biosynthesis of other secondary metabolites
10	map05202	Transcriptional misregulation in cancer	KEGG PATHWAY	10/493	186/13589	0.139483	0.402299	Human Diseases	Cancers: Overview
3	map04623	Cytosolic DNA-sensing pathway	KEGG PATHWAY	3/493	36/13589	0.141035	0.402538	Organismal Systems	Immune system
3	map01523	Antifolate resistance	KEGG PATHWAY	3/493	36/13589	0.141035	0.402538	Human Diseases	Drug resistance: Antineoplastic
2	map05143	African trypanosomiasis	KEGG PATHWAY	2/493	18/13589	0.137307	0.40454	Human Diseases	Infectious diseases: Parasitic
14	map05166	Human T-cell leukemia virus 1 infection	KEGG PATHWAY	14/493	284/13589	0.152363	0.417474	Human Diseases	Infectious diseases: Viral
6	map04380	Osteoclast differentiation	KEGG PATHWAY	6/493	101/13589	0.160583	0.43564	Organismal Systems	Development
7	map04916	Melanogenesis	KEGG PATHWAY	7/493	125/13589	0.168996	0.453971	Organismal Systems	Endocrine system
9	map04919	Thyroid hormone signaling pathway	KEGG PATHWAY	9/493	172/13589	0.173581	0.46176	Organismal Systems	Endocrine system
7	map04146	Peroxisome	KEGG PATHWAY	7/493	129/13589	0.188456	0.487141	Cellular Processes	Transport and catabolism
4	map00380	Tryptophan metabolism	KEGG PATHWAY	4/493	62/13589	0.18724	0.493305	Metabolism	Amino acid metabolism
4	map04974	Protein digestion and absorption	KEGG PATHWAY	4/493	62/13589	0.18724	0.493305	Organismal Systems	Digestive system
9	map04152	AMPK signaling pathway	KEGG PATHWAY	9/493	177/13589	0.194493	0.498047	Environmental Information Processing	Signal transduction
3	map05219	Bladder cancer	KEGG PATHWAY	3/493	43/13589	0.204031	0.499147	Human Diseases	Cancers: Specific types
7	map05162	Measles	KEGG PATHWAY	7/493	132/13589	0.203622	0.502634	Human Diseases	Infectious diseases: Viral
12	map05163	Human cytomegalovirus infection	KEGG PATHWAY	12/493	250/13589	0.198452	0.503481	Human Diseases	Infectious diseases: Viral
9	map04391	Hippo signaling pathway - fly	KEGG PATHWAY	9/493	179/13589	0.203147	0.506022	Environmental Information Processing	Signal transduction
4	map00500	Starch and sucrose metabolism	KEGG PATHWAY	4/493	64/13589	0.202151	0.508159	Metabolism	Carbohydrate metabolism
2	map04744	Phototransduction	KEGG PATHWAY	2/493	24/13589	0.215836	0.523355	Organismal Systems	Sensory system
5	map04726	Serotonergic synapse	KEGG PATHWAY	5/493	89/13589	0.221462	0.532285	Organismal Systems	Nervous system
6	map04970	Salivary secretion	KEGG PATHWAY	6/493	113/13589	0.227278	0.541515	Organismal Systems	Digestive system
11	map04921	Oxytocin signaling pathway	KEGG PATHWAY	11/493	237/13589	0.243182	0.555266	Organismal Systems	Endocrine system
8	map04072	Phospholipase D signaling pathway	KEGG PATHWAY	8/493	163/13589	0.240509	0.563242	Environmental Information Processing	Signal transduction
4	map05221	Acute myeloid leukemia	KEGG PATHWAY	4/493	70/13589	0.248753	0.563291	Human Diseases	Cancers: Specific types
2	map00360	Phenylalanine metabolism	KEGG PATHWAY	2/493	26/13589	0.242914	0.564054	Metabolism	Amino acid metabolism
2	map00592	alpha-Linolenic acid metabolism	KEGG PATHWAY	2/493	26/13589	0.242914	0.564054	Metabolism	Lipid metabolism
6	map05131	Shigellosis	KEGG PATHWAY	6/493	115/13589	0.239184	0.564968	Human Diseases	Infectious diseases: Bacterial
2	map00040	Pentose and glucuronate interconversions	KEGG PATHWAY	2/493	27/13589	0.256511	0.576099	Metabolism	Carbohydrate metabolism
11	map04932	Non-alcoholic fatty liver disease (NAFLD)	KEGG PATHWAY	11/493	241/13589	0.259992	0.579169	Human Diseases	Endocrine and metabolic diseases
5	map00520	Amino sugar and nucleotide sugar metabolism	KEGG PATHWAY	5/493	96/13589	0.269098	0.594619	Metabolism	Carbohydrate metabolism
9	map04210	Apoptosis	KEGG PATHWAY	9/493	194/13589	0.272577	0.597488	Cellular Processes	Cell growth and death
14	map04510	Focal adhesion	KEGG PATHWAY	14/493	321/13589	0.27736	0.598399	Cellular Processes	Cellular community - eukaryotes
7	map00240	Pyrimidine metabolism	KEGG PATHWAY	7/493	146/13589	0.279714	0.598762	Metabolism	Nucleotide metabolism
5	map00030	Pentose phosphate pathway	KEGG PATHWAY	5/493	97/13589	0.276086	0.600378	Metabolism	Carbohydrate metabolism
1	map00430	Taurine and hypotaurine metabolism	KEGG PATHWAY	1/493	9/13589	0.283003	0.601108	Metabolism	Metabolism of other amino acids
3	map04979	Cholesterol metabolism	KEGG PATHWAY	3/493	52/13589	0.291961	0.615363	Organismal Systems	Digestive system
6	map05410	Hypertrophic cardiomyopathy (HCM)	KEGG PATHWAY	6/493	124/13589	0.294789	0.616582	Human Diseases	Cardiovascular diseases
5	map05416	Viral myocarditis	KEGG PATHWAY	5/493	101/13589	0.30438	0.631819	Human Diseases	Cardiovascular diseases
5	map01522	Endocrine resistance	KEGG PATHWAY	5/493	101/13589	0.30438	0.631819	Human Diseases	Drug resistance: Antineoplastic
3	map00052	Galactose metabolism	KEGG PATHWAY	3/493	54/13589	0.31197	0.637909	Metabolism	Carbohydrate metabolism
6	map04071	Sphingolipid signaling pathway	KEGG PATHWAY	6/493	128/13589	0.320303	0.650096	Environmental Information Processing	Signal transduction
2	map04913	Ovarian steroidogenesis	KEGG PATHWAY	2/493	33/13589	0.337734	0.680434	Organismal Systems	Endocrine system
4	map00620	Pyruvate metabolism	KEGG PATHWAY	4/493	82/13589	0.346973	0.68396	Metabolism	Carbohydrate metabolism
3	map04978	Mineral absorption	KEGG PATHWAY	3/493	58/13589	0.352038	0.684102	Organismal Systems	Digestive system
2	map00590	Arachidonic acid metabolism	KEGG PATHWAY	2/493	34/13589	0.351065	0.687084	Metabolism	Lipid metabolism
6	map04660	T cell receptor signaling pathway	KEGG PATHWAY	6/493	134/13589	0.359112	0.688088	Organismal Systems	Immune system
1	map00532	Glycosaminoglycan biosynthesis - chondroitin sulfate / dermatan sulfate	KEGG PATHWAY	1/493	12/13589	0.358296	0.69136	Metabolism	Glycan biosynthesis and metabolism
6	map04670	Leukocyte transendothelial migration	KEGG PATHWAY	6/493	132/13589	0.346125	0.692249	Organismal Systems	Immune system
6	map04212	Longevity regulating pathway - worm	KEGG PATHWAY	6/493	132/13589	0.346125	0.692249	Organismal Systems	Aging
2	map04610	Complement and coagulation cascades	KEGG PATHWAY	2/493	35/13589	0.364303	0.693187	Organismal Systems	Immune system
8	map04142	Lysosome	KEGG PATHWAY	8/493	189/13589	0.379351	0.702312	Cellular Processes	Transport and catabolism
4	map00330	Arginine and proline metabolism	KEGG PATHWAY	4/493	85/13589	0.371881	0.702727	Metabolism	Amino acid metabolism
9	map05206	MicroRNAs in cancer	KEGG PATHWAY	9/493	215/13589	0.378761	0.705989	Human Diseases	Cancers: Overview
2	map00450	Selenocompound metabolism	KEGG PATHWAY	2/493	36/13589	0.377436	0.708339	Metabolism	Metabolism of other amino acids
2	map00565	Ether lipid metabolism	KEGG PATHWAY	2/493	37/13589	0.390455	0.713232	Metabolism	Lipid metabolism
4	map04745	Phototransduction - fly	KEGG PATHWAY	4/493	87/13589	0.388454	0.714337	Organismal Systems	Sensory system
13	map04151	PI3K-Akt signaling pathway	KEGG PATHWAY	13/493	324/13589	0.395044	0.716835	Environmental Information Processing	Signal transduction
2	map03020	RNA polymerase	KEGG PATHWAY	2/493	39/13589	0.416116	0.750104	Genetic Information Processing	Transcription
3	map04740	Olfactory transduction	KEGG PATHWAY	3/493	65/13589	0.421259	0.754411	Organismal Systems	Sensory system
4	map05412	Arrhythmogenic right ventricular cardiomyopathy (ARVC)	KEGG PATHWAY	4/493	92/13589	0.429568	0.759365	Human Diseases	Cardiovascular diseases
2	map02010	ABC transporters	KEGG PATHWAY	2/493	40/13589	0.428742	0.762827	Environmental Information Processing	Membrane transport
1	map04950	Maturity onset diabetes of the young	KEGG PATHWAY	1/493	17/13589	0.466658	0.799151	Human Diseases	Endocrine and metabolic diseases
1	map00514	Other types of O-glycan biosynthesis	KEGG PATHWAY	1/493	17/13589	0.466658	0.799151	Metabolism	Glycan biosynthesis and metabolism
7	map04934	Cushing syndrome	KEGG PATHWAY	7/493	176/13589	0.456807	0.802341	Human Diseases	Endocrine and metabolic diseases
5	map04550	Signaling pathways regulating pluripotency of stem cells	KEGG PATHWAY	5/493	123/13589	0.462736	0.802466	Cellular Processes	Cellular community - eukaryotes
2	map04622	RIG-I-like receptor signaling pathway	KEGG PATHWAY	2/493	43/13589	0.465723	0.802567	Organismal Systems	Immune system
8	map04915	Estrogen signaling pathway	KEGG PATHWAY	8/493	204/13589	0.462312	0.806837	Organismal Systems	Endocrine system
2	map00071	Fatty acid degradation	KEGG PATHWAY	2/493	44/13589	0.477733	0.808017	Metabolism	Lipid metabolism
2	map00980	Metabolism of xenobiotics by cytochrome P450	KEGG PATHWAY	2/493	45/13589	0.489576	0.817951	Metabolism	Xenobiotics biodegradation and metabolism
11	map04810	Regulation of actin cytoskeleton	KEGG PATHWAY	11/493	292/13589	0.492906	0.818523	Cellular Processes	Cell motility
3	map04514	Cell adhesion molecules (CAMs)	KEGG PATHWAY	3/493	72/13589	0.487828	0.820029	Environmental Information Processing	Signaling molecules and interaction
3	map04080	Neuroactive ligand-receptor interaction	KEGG PATHWAY	3/493	73/13589	0.49704	0.820416	Environmental Information Processing	Signaling molecules and interaction
1	map00920	Sulfur metabolism	KEGG PATHWAY	1/493	19/13589	0.504702	0.828075	Metabolism	Energy metabolism
3	map05212	Pancreatic cancer	KEGG PATHWAY	3/493	75/13589	0.515211	0.840285	Human Diseases	Cancers: Specific types
2	map00510	N-Glycan biosynthesis	KEGG PATHWAY	2/493	48/13589	0.524075	0.849684	Metabolism	Glycan biosynthesis and metabolism
2	map04710	Circadian rhythm	KEGG PATHWAY	2/493	49/13589	0.535221	0.862651	Organismal Systems	Environmental adaptation
5	map04211	Longevity regulating pathway	KEGG PATHWAY	5/493	134/13589	0.538487	0.862839	Organismal Systems	Aging
3	map05214	Glioma	KEGG PATHWAY	3/493	78/13589	0.541794	0.86309	Human Diseases	Cancers: Specific types
5	map04925	Aldosterone synthesis and secretion	KEGG PATHWAY	5/493	135/13589	0.545136	0.863395	Organismal Systems	Endocrine system
8	map00230	Purine metabolism	KEGG PATHWAY	8/493	222/13589	0.558444	0.87939	Metabolism	Nucleotide metabolism
2	map04961	Endocrine and other factor-regulated calcium reabsorption	KEGG PATHWAY	2/493	52/13589	0.567571	0.883605	Organismal Systems	Excretory system
9	map04015	Rap1 signaling pathway	KEGG PATHWAY	9/493	253/13589	0.571873	0.885273	Environmental Information Processing	Signal transduction
3	map04512	ECM-receptor interaction	KEGG PATHWAY	3/493	81/13589	0.567517	0.888569	Environmental Information Processing	Signaling molecules and interaction
2	map05020	Prion diseases	KEGG PATHWAY	2/493	53/13589	0.577987	0.889711	Human Diseases	Neurodegenerative diseases
3	map04971	Gastric acid secretion	KEGG PATHWAY	3/493	84/13589	0.592335	0.891757	Organismal Systems	Digestive system
5	map04728	Dopaminergic synapse	KEGG PATHWAY	5/493	142/13589	0.590341	0.893666	Organismal Systems	Nervous system
5	map05100	Bacterial invasion of epithelial cells	KEGG PATHWAY	5/493	141/13589	0.584034	0.893996	Human Diseases	Infectious diseases: Bacterial
1	map00591	Linoleic acid metabolism	KEGG PATHWAY	1/493	24/13589	0.588381	0.895646	Metabolism	Lipid metabolism
5	map04012	ErbB signaling pathway	KEGG PATHWAY	5/493	147/13589	0.621071	0.895649	Environmental Information Processing	Signal transduction
7	map05225	Hepatocellular carcinoma	KEGG PATHWAY	7/493	205/13589	0.618401	0.896518	Human Diseases	Cancers: Specific types
4	map05414	Dilated cardiomyopathy (DCM)	KEGG PATHWAY	4/493	115/13589	0.60438	0.900001	Human Diseases	Cardiovascular diseases
2	map00910	Nitrogen metabolism	KEGG PATHWAY	2/493	56/13589	0.608126	0.900684	Metabolism	Energy metabolism
5	map05226	Gastric cancer	KEGG PATHWAY	5/493	144/13589	0.602797	0.902548	Human Diseases	Cancers: Specific types
1	map04975	Fat digestion and absorption	KEGG PATHWAY	1/493	26/13589	0.617758	0.905164	Organismal Systems	Digestive system
1	map00534	Glycosaminoglycan biosynthesis - heparan sulfate / heparin	KEGG PATHWAY	1/493	26/13589	0.617758	0.905164	Metabolism	Glycan biosynthesis and metabolism
5	map04270	Vascular smooth muscle contraction	KEGG PATHWAY	5/493	146/13589	0.615035	0.906019	Organismal Systems	Circulatory system
1	map00770	Pantothenate and CoA biosynthesis	KEGG PATHWAY	1/493	27/13589	0.631652	0.906139	Metabolism	Metabolism of cofactors and vitamins
1	map00340	Histidine metabolism	KEGG PATHWAY	1/493	27/13589	0.631652	0.906139	Metabolism	Amino acid metabolism
1	map04964	Proximal tubule bicarbonate reclamation	KEGG PATHWAY	1/493	29/13589	0.657946	0.910491	Organismal Systems	Excretory system
1	map04940	Type I diabetes mellitus	KEGG PATHWAY	1/493	29/13589	0.657946	0.910491	Human Diseases	Endocrine and metabolic diseases
4	map04713	Circadian entrainment	KEGG PATHWAY	4/493	123/13589	0.657059	0.913879	Organismal Systems	Environmental adaptation
2	map00020	Citrate cycle (TCA cycle)	KEGG PATHWAY	2/493	60/13589	0.645726	0.91673	Metabolism	Carbohydrate metabolism
1	map04215	Apoptosis - multiple species	KEGG PATHWAY	1/493	30/13589	0.670382	0.918423	Cellular Processes	Cell growth and death
3	map00051	Fructose and mannose metabolism	KEGG PATHWAY	3/493	92/13589	0.653868	0.923505	Metabolism	Carbohydrate metabolism
3	map05220	Chronic myeloid leukemia	KEGG PATHWAY	3/493	92/13589	0.653868	0.923505	Human Diseases	Cancers: Specific types
3	map03320	PPAR signaling pathway	KEGG PATHWAY	3/493	92/13589	0.653868	0.923505	Organismal Systems	Endocrine system
2	map04664	Fc epsilon RI signaling pathway	KEGG PATHWAY	2/493	65/13589	0.688643	0.929498	Organismal Systems	Immune system
3	map04750	Inflammatory mediator regulation of TRP channels	KEGG PATHWAY	3/493	96/13589	0.682036	0.92974	Organismal Systems	Sensory system
4	map05215	Prostate cancer	KEGG PATHWAY	4/493	128/13589	0.687492	0.932539	Human Diseases	Cancers: Specific types
1	map01040	Biosynthesis of unsaturated fatty acids	KEGG PATHWAY	1/493	33/13589	0.705047	0.933251	Metabolism	Lipid metabolism
6	map04140	Autophagy - animal	KEGG PATHWAY	6/493	191/13589	0.696598	0.935627	Cellular Processes	Transport and catabolism
2	map04340	Hedgehog signaling pathway	KEGG PATHWAY	2/493	67/13589	0.704574	0.937152	Environmental Information Processing	Signal transduction
3	map04924	Renin secretion	KEGG PATHWAY	3/493	99/13589	0.702019	0.938308	Organismal Systems	Endocrine system
5	map04217	Necroptosis	KEGG PATHWAY	5/493	164/13589	0.714674	0.941446	Cellular Processes	Cell growth and death
2	map04962	Vasopressin-regulated water reabsorption	KEGG PATHWAY	2/493	69/13589	0.719822	0.94369	Organismal Systems	Excretory system
1	map00563	Glycosylphosphatidylinositol (GPI)-anchor biosynthesis	KEGG PATHWAY	1/493	35/13589	0.726112	0.947403	Metabolism	Glycan biosynthesis and metabolism
6	map04062	Chemokine signaling pathway	KEGG PATHWAY	6/493	200/13589	0.737671	0.953405	Organismal Systems	Immune system
4	map04612	Antigen processing and presentation	KEGG PATHWAY	4/493	137/13589	0.737348	0.957504	Organismal Systems	Immune system
5	map04114	Oocyte meiosis	KEGG PATHWAY	5/493	171/13589	0.748099	0.957847	Cellular Processes	Cell growth and death
1	map00640	Propanoate metabolism	KEGG PATHWAY	1/493	37/13589	0.745674	0.959224	Metabolism	Carbohydrate metabolism
3	map03015	mRNA surveillance pathway	KEGG PATHWAY	3/493	108/13589	0.756209	0.963727	Genetic Information Processing	Translation
10	map04144	Endocytosis	KEGG PATHWAY	10/493	332/13589	0.769596	0.976246	Cellular Processes	Transport and catabolism
5	map03040	Spliceosome	KEGG PATHWAY	5/493	191/13589	0.827457	0.981486	Genetic Information Processing	Transcription
3	map04911	Insulin secretion	KEGG PATHWAY	3/493	112/13589	0.777615	0.981873	Organismal Systems	Endocrine system
1	map00982	Drug metabolism - cytochrome P450	KEGG PATHWAY	1/493	47/13589	0.82445	0.982171	Metabolism	Xenobiotics biodegradation and metabolism
4	map04520	Adherens junction	KEGG PATHWAY	4/493	156/13589	0.822482	0.984105	Cellular Processes	Cellular community - eukaryotes
3	map04724	Glutamatergic synapse	KEGG PATHWAY	3/493	121/13589	0.820151	0.98562	Organismal Systems	Nervous system
2	map04918	Thyroid hormone synthesis	KEGG PATHWAY	2/493	89/13589	0.838672	0.98625	Organismal Systems	Endocrine system
1	map05216	Thyroid cancer	KEGG PATHWAY	1/493	42/13589	0.788694	0.986768	Human Diseases	Cancers: Specific types
4	map04261	Adrenergic signaling in cardiomyocytes	KEGG PATHWAY	4/493	155/13589	0.818643	0.988142	Organismal Systems	Circulatory system
2	map05213	Endometrial cancer	KEGG PATHWAY	2/493	79/13589	0.786407	0.988419	Human Diseases	Cancers: Specific types
1	map00600	Sphingolipid metabolism	KEGG PATHWAY	1/493	49/13589	0.837	0.988525	Metabolism	Lipid metabolism
3	map04972	Pancreatic secretion	KEGG PATHWAY	3/493	116/13589	0.797453	0.988697	Organismal Systems	Digestive system
1	map04341	Hedgehog signaling pathway - fly	KEGG PATHWAY	1/493	46/13589	0.817818	0.991514	Environmental Information Processing	Signal transduction
1	map04960	Aldosterone-regulated sodium reabsorption	KEGG PATHWAY	1/493	43/13589	0.796384	0.99186	Organismal Systems	Excretory system
1	map00410	beta-Alanine metabolism	KEGG PATHWAY	1/493	44/13589	0.803795	0.992071	Metabolism	Metabolism of other amino acids
1	map04742	Taste transduction	KEGG PATHWAY	1/493	44/13589	0.803795	0.992071	Organismal Systems	Sensory system
1	map00900	Terpenoid backbone biosynthesis	KEGG PATHWAY	1/493	44/13589	0.803795	0.992071	Metabolism	Metabolism of terpenoids and polyketides
4	map05034	Alcoholism	KEGG PATHWAY	4/493	154/13589	0.814737	0.992169	Human Diseases	Substance dependence
1	map05218	Melanoma	KEGG PATHWAY	1/493	51/13589	0.848654	0.993723	Human Diseases	Cancers: Specific types
5	map04068	FoxO signaling pathway	KEGG PATHWAY	5/493	199/13589	0.852953	0.994507	Environmental Information Processing	Signal transduction
4	map04611	Platelet activation	KEGG PATHWAY	4/493	167/13589	0.860426	0.998969	Organismal Systems	Immune system
3	map03010	Ribosome	KEGG PATHWAY	3/493	700/13589	1	1	Genetic Information Processing	Translation
2	map01524	Platinum drug resistance	KEGG PATHWAY	2/493	96/13589	0.868068	1	Human Diseases	Drug resistance: Antineoplastic
3	map05130	Pathogenic Escherichia coli infection	KEGG PATHWAY	3/493	135/13589	0.872484	1	Human Diseases	Infectious diseases: Bacterial
1	map05204	Chemical carcinogenesis	KEGG PATHWAY	1/493	56/13589	0.874279	1	Human Diseases	Cancers: Overview
5	map04022	cGMP-PKG signaling pathway	KEGG PATHWAY	5/493	208/13589	0.877816	1	Environmental Information Processing	Signal transduction
2	map04720	Long-term potentiation	KEGG PATHWAY	2/493	101/13589	0.885966	1	Organismal Systems	Nervous system
4	map04120	Ubiquitin mediated proteolysis	KEGG PATHWAY	4/493	176/13589	0.886114	1	Genetic Information Processing	Folding, sorting and degradation
1	map03050	Proteasome	KEGG PATHWAY	1/493	59/13589	0.887525	1	Genetic Information Processing	Folding, sorting and degradation
3	map04213	Longevity regulating pathway - multiple species	KEGG PATHWAY	3/493	146/13589	0.903669	1	Organismal Systems	Aging
2	map04725	Cholinergic synapse	KEGG PATHWAY	2/493	111/13589	0.915206	1	Organismal Systems	Nervous system
1	map03460	Fanconi anemia pathway	KEGG PATHWAY	1/493	67/13589	0.916428	1	Genetic Information Processing	Replication and repair
2	map03018	RNA degradation	KEGG PATHWAY	2/493	113/13589	0.92014	1	Genetic Information Processing	Folding, sorting and degradation
1	map04923	Regulation of lipolysis in adipocytes	KEGG PATHWAY	1/493	69/13589	0.922411	1	Organismal Systems	Endocrine system
4	map00010	Glycolysis / Gluconeogenesis	KEGG PATHWAY	4/493	193/13589	0.923578	1	Metabolism	Carbohydrate metabolism
1	map05223	Non-small cell lung cancer	KEGG PATHWAY	1/493	70/13589	0.925241	1	Human Diseases	Cancers: Specific types
1	map04927	Cortisol synthesis and secretion	KEGG PATHWAY	1/493	71/13589	0.927967	1	Organismal Systems	Endocrine system
1	map04115	p53 signaling pathway	KEGG PATHWAY	1/493	72/13589	0.930594	1	Cellular Processes	Cell growth and death
1	map00561	Glycerolipid metabolism	KEGG PATHWAY	1/493	73/13589	0.933125	1	Metabolism	Lipid metabolism
7	map05010	Alzheimer disease	KEGG PATHWAY	7/493	315/13589	0.94273	1	Human Diseases	Neurodegenerative diseases
2	map04540	Gap junction	KEGG PATHWAY	2/493	125/13589	0.944508	1	Cellular Processes	Cellular community - eukaryotes
6	map00190	Oxidative phosphorylation	KEGG PATHWAY	6/493	283/13589	0.947285	1	Metabolism	Energy metabolism
6	map04141	Protein processing in endoplasmic reticulum	KEGG PATHWAY	6/493	283/13589	0.947285	1	Genetic Information Processing	Folding, sorting and degradation
1	map04727	GABAergic synapse	KEGG PATHWAY	1/493	86/13589	0.958754	1	Organismal Systems	Nervous system
1	map05032	Morphine addiction	KEGG PATHWAY	1/493	86/13589	0.958754	1	Human Diseases	Substance dependence
1	map04392	Hippo signaling pathway - multiple species	KEGG PATHWAY	1/493	87/13589	0.96026	1	Environmental Information Processing	Signal transduction
1	map01521	EGFR tyrosine kinase inhibitor resistance	KEGG PATHWAY	1/493	87/13589	0.96026	1	Human Diseases	Drug resistance: Antineoplastic
2	map04666	Fc gamma R-mediated phagocytosis	KEGG PATHWAY	2/493	144/13589	0.969231	1	Organismal Systems	Immune system
1	map04650	Natural killer cell mediated cytotoxicity	KEGG PATHWAY	1/493	96/13589	0.971569	1	Organismal Systems	Immune system
3	map04110	Cell cycle	KEGG PATHWAY	3/493	196/13589	0.975364	1	Cellular Processes	Cell growth and death
1	map00260	Glycine, serine and threonine metabolism	KEGG PATHWAY	1/493	101/13589	0.976397	1	Metabolism	Amino acid metabolism
4	map03013	RNA transport	KEGG PATHWAY	4/493	241/13589	0.977271	1	Genetic Information Processing	Translation
8	map04714	Thermogenesis	KEGG PATHWAY	8/493	429/13589	0.989159	1	Organismal Systems	Environmental adaptation
1	map04260	Cardiac muscle contraction	KEGG PATHWAY	1/493	125/13589	0.99035	1	Organismal Systems	Circulatory system
1	map04914	Progesterone-mediated oocyte maturation	KEGG PATHWAY	1/493	125/13589	0.99035	1	Organismal Systems	Endocrine system
11	map00310	Lysine degradation	KEGG PATHWAY	11/493	559/13589	0.992595	1	Metabolism	Amino acid metabolism
1	map00630	Glyoxylate and dicarboxylate metabolism	KEGG PATHWAY	1/493	139/13589	0.994277	1	Metabolism	Carbohydrate metabolism
3	map05012	Parkinson disease	KEGG PATHWAY	3/493	276/13589	0.997739	1	Human Diseases	Neurodegenerative diseases
2	map05016	Huntington disease	KEGG PATHWAY	2/493	365/13589	0.999983	1	Human Diseases	Neurodegenerative diseases
